# Supplementary material
Source: ML conference proceedings conference paper supplement (https://proceedings.neurips.cc/paper_files/paper/2020/hash/b282d1735283e8eea45bce393cefe265-Abstract.html)
Supplement: Supplementary file [file b282d1735283e8eea45bce393cefe265-Supplemental.zip]

---

# Supplementary Material for *Improved Analysis of Clipping Algorithms for Non-convex Optimization*

---

Anonymous Author(s)

Affiliation

Address

email

## 1 Appendix A Properties of $(L_0, L_1)$ -smooth functions

2 In this section, we prove some important properties of  $(L_0, L_1)$ -smooth functions. These properties  
3 will be frequently used in subsequent sections.

4 We first present a basic lemma without proof.

5 **Lemma A.1** (*Grönwall's inequality*) [Gronwall, 1919] Let  $I = [a, b]$  denote an interval of the real  
6 line with  $a < b$ . Let  $f, g, h$  be continuous real-valued functions defined on  $I$ . Assume  $g$  is non-  
7 decreasing,  $h$  is non-negative, and the negative part of  $g$  is integrable on every closed and bounded  
8 subinterval of  $I$ . If

$$f(t) \leq g(t) + \int_a^t h(s)f(s)ds, \quad \forall t \in I, \quad (1)$$

9 then

$$f(t) \leq g(t) \exp\left(\int_a^t h(s)ds\right), \quad \forall t \in I. \quad (2)$$

10 The following result, Lemma A.2, is a generalization of Lemma 9 in Zhang et al. [2020].

11 **Lemma A.2** Let  $F$  be  $(L_0, L_1)$ -smooth, and  $c > 0$  be a constant. Given  $x$ , for any  $x^+$  such that  
12  $\|x^+ - x\| \leq c/L_1$ , we have  $\|\nabla f(x^+)\| \leq e^c \left(\frac{cL_0}{L_1} + \|\nabla F(x)\|\right)$ .

**Proof:** Let  $\gamma(t)$  be defined as  $\gamma(t) = t(x^+ - x) + x, t \in [0, 1]$ , then we have

$$\nabla F(\gamma(t)) = \int_0^t \nabla^2 F(\gamma(\tau)) (x^+ - x) d\tau + \nabla F(\gamma(0))$$

13 We then bound the norm of  $\nabla F(\gamma(t))$ :

$$\|\nabla F(\gamma(t))\| \leq \int_0^t \|\nabla^2 F(\gamma(\tau)) (x^+ - x)\| d\tau + \|\nabla F(\gamma(0))\| \quad (3)$$

$$\leq \|x^+ - x\| \int_0^t \|\nabla^2 F(\gamma(\tau))\| d\tau + \|\nabla F(x)\| \quad (4)$$

$$\leq \frac{c}{L_1} \int_0^t (L_0 + L_1 \|\nabla F(\gamma(\tau))\|) d\tau + \|\nabla F(x)\| \quad (5)$$

14 The first inequality uses the triangular inequality of 2-norm; The second inequality uses the property  
15 of spectral norm; The third inequality uses the definition of  $(L_0, L_1)$ -smoothness. By applying the  
16 Grönwall's inequality we get

$$\|\nabla F(\gamma(t))\| \leq \left(\frac{L_0}{L_1} ct + \|\nabla F(x)\|\right) \exp(ct) \quad (6)$$

17 The Lemma follows by setting  $t = 1$ . □

18 Now we are able to prove a *descent inequality*, which is similar to the descent inequality for  $L$ -  
 19 smooth functions. In fact, if a function  $F$  is  $L$ -smooth, it is well-known that for any  $x, y$ , we have  
 20

$$F(y) \leq F(x) + \langle \nabla F(x), y - x \rangle + \frac{L}{2} \|y - x\|^2$$

21

22 **Lemma A.3** (*Descent Inequality*) Let  $F$  be  $(L_0, L_1)$ -smooth, and  $c > 0$  be a constant. For any  $x_k$   
 23 and  $x_{k+1}$ , as long as  $\|x_k - x_{k+1}\| \leq c/L_1$ , we have

$$F(x_{k+1}) \leq F(x_k) + \langle \nabla F(x_k), x_{k+1} - x_k \rangle + \frac{AL_0 + BL_1 \|\nabla F(x_k)\|}{2} \|x_{k+1} - x_k\|^2 \quad (7)$$

24 where  $A = 1 + e^c - \frac{e^c - 1}{c}$ ,  $B = \frac{e^c - 1}{c}$ .

25 **Proof:** Let  $\gamma(t)$  be defined as  $\gamma(t) = t(x_{k+1} - x_k) + x_k, t \in [0, 1]$ . The following derivation  
 26 uses Taylor's theorem (in (8)), then uses triangular inequality, Cauchy-Schwarz inequality and the  
 27 property of spectral norm (in (9)):

$$F(x_{k+1}) \leq F(x_k) + \langle \nabla F(x_k), x_{k+1} - x_k \rangle + \int_0^1 (x_{k+1} - x_k)^T \nabla^2 F(\gamma(t)) (x_{k+1} - \gamma(t)) dt \quad (8)$$

$$\leq F(x_k) + \langle \nabla F(x_k), x_{k+1} - x_k \rangle + \int_0^1 \|(x_{k+1} - x_k)\| \|\nabla^2 F(\gamma(t))\| \|x_{k+1} - \gamma(t)\| dt \quad (9)$$

$$= F(x_k) + \langle \nabla F(x_k), x_{k+1} - x_k \rangle + \frac{\|x_{k+1} - x_k\|^2}{2} \int_0^1 \|\nabla^2 F(\gamma(t))\| dt \quad (10)$$

28 Then we use  $(L_0, L_1)$ -smoothness and (6) to bound  $\|\nabla^2 F(\gamma(t))\|$ :

$$\begin{aligned} \|\nabla^2 F(\gamma(t))\| &\leq L_0 + L_1 \|\nabla F(\gamma(t))\| \\ &\leq L_0 + L_1 \left( \frac{L_0}{L_1} ct + \|\nabla F(x_k)\| \right) \exp(ct) \end{aligned} \quad (11)$$

29 Taking integration we get

$$\int_0^1 \|\nabla^2 F(\gamma(t))\| dt \leq L_0 \left( 1 + e^c - \frac{e^c - 1}{c} \right) + \frac{e^c - 1}{c} L_1 \|\nabla F(x_k)\| \quad (12)$$

30 Substituting (12) into (10) concludes the proof. □

31 **Corollary A.4** Let  $F$  be  $(L_0, L_1)$ -smooth, and  $c > 0$  be a constant. For any  $x_k$  and  $x_{k+1}$ , as long  
 32 as  $\|x_k - x_{k+1}\| \leq c/L_1$ , we have

$$\|\nabla F(x_{k+1}) - \nabla F(x_k)\| \leq (AL_0 + BL_1 \|\nabla F(x_k)\|) \|x_{k+1} - x_k\| \quad (13)$$

33 where  $A = 1 + e^c - \frac{e^c - 1}{c}$ ,  $B = \frac{e^c - 1}{c}$ .

**Proof:**

$$\begin{aligned} \|\nabla F(x_k) - \nabla F(x_{k-1})\| &= \left\| \int_0^1 \nabla^2 F(tx_{k-1} + (1-t)x_k)(x_k - x_{k-1}) dt \right\| \\ &\leq \int_0^1 \|\nabla^2 F(tx_{k-1} + (1-t)x_k)\| \|x_k - x_{k-1}\| dt \end{aligned} \quad (14)$$

34 Using (12) leads to the results. □

35 Finally we prove a result which provides a way to upper-bound the gradient norm. A similar result  
 36 for  $L$ -smooth functions is the following: if  $F$  is  $L$ -smooth, then for any  $x$ , we have

$$\|\nabla F(x)\|^2 \leq 2L \left( F(x) - \inf_{y \in \mathbb{R}^d} F(y) \right)$$

37

**Lemma A.5** (Bounding the gradient norm) Let  $F(x)$  be an  $(L_0, L_1)$ -smooth function, and  $F^*$  be the optimal value. Then for any  $x_0$ , we have

$$\min \left( \frac{\|\nabla F(x_0)\|}{L_1}, \frac{\|\nabla F(x_0)\|^2}{L_0} \right) \leq 8(F(x_0) - F^*) \quad (15)$$

**Proof:** Define the constant  $c = \frac{L_1 \|\nabla F(x_0)\|}{AL_0 + BL_1 \|\nabla F(x_0)\|}$  and  $A = 1 + e^c - \frac{e^c - 1}{c}$ ,  $B = \frac{e^c - 1}{c}$ . It is easy to see that such  $0 \leq c < 1$  exists. Let  $\lambda = \frac{1}{AL_0 + BL_1 \|\nabla F(x_0)\|}$  and  $x = x_0 - \lambda \nabla F(x_0)$ . Then  $\|x - x_0\| \leq c/L_1$ . By the descent inequality we have

$$\begin{aligned} F^* \leq F(x) &\leq F(x_0) - \lambda \|\nabla F(x_0)\|^2 + \frac{AL_0 + BL_1 \|\nabla F(x_0)\|}{2} \lambda^2 \|\nabla F(x_0)\|^2 \\ &= F(x_0) - \frac{1}{2} \lambda \|\nabla F(x_0)\|^2 \end{aligned} \quad (16)$$

If  $\|\nabla F(x)\| \geq \frac{AL_0}{BL_1}$ , then

$$F(x_0) - F^* \geq \frac{\|\nabla F(x_0)\|}{2 \left( \frac{AL_0}{\|\nabla F(x_0)\|} + BL_1 \right)} \geq \frac{\|\nabla F(x_0)\|}{4BL_1} \geq \frac{\|\nabla F(x_0)\|}{8L_1} \quad (17)$$

If  $\|\nabla F(x)\| < \frac{AL_0}{BL_1}$ , then

$$F(x_0) - F^* \geq \frac{1}{2} \lambda \|\nabla F(x_0)\|^2 \geq \frac{\|\nabla F(x_0)\|^2}{4AL_0} \geq \frac{\|\nabla F(x_0)\|^2}{8L_0} \quad (18)$$

□

#### A.1 Relaxation of $(L_0, L_1)$ -smoothness (Remark 2.3)

The original definition of  $(L_0, L_1)$ -smoothness requires the function to be twice-differentiable. Under this definition,  $(L_0, L_1)$ -smoothness is actually *not* weaker than  $L$ -smoothness, which only requires the function to be continuous differentiable. In this section we prove that the alternative definition provided in Remark 2.3 is sufficient for all the results in this paper.

Now, suppose that there exists  $K_0, K_1 > 0$  such that for all  $x, y \in \mathbb{R}^d$ , if  $\|x - y\| \leq \frac{1}{K_1}$ , then

$$\|\nabla F(x) - \nabla F(y)\| \leq (K_0 + K_1 \|\nabla F(y)\|) \|x - y\| \quad (19)$$

We check that Lemma A.2 and A.3 still holds under the new assumption (with  $L_0, L_1$  replaced by  $K_0, K_1$ , up to numerical constants) We immediately obtain from (19) above that

$$\|\nabla F(x)\| \leq 2\|\nabla F(y)\| + \frac{K_0}{K_1} \quad (20)$$

which is of the same form as Lemma A.2. Next, we have

$$\begin{aligned} &F(y) - F(x) - \langle y - x, \nabla F(x) \rangle \\ &= \int_0^1 \langle \nabla F(\theta y + (1 - \theta)x) - \nabla F(x), x - y \rangle d\theta \\ &\leq \int_0^1 (K_0 \theta \|x - y\|^2 + K_1 \theta \|x - y\|^2 \|\nabla F(x)\|) d\theta \\ &\leq \frac{K_0 + K_1 \|\nabla F(x)\|}{2} \|x - y\|^2 \end{aligned} \quad (21)$$

which is of the same form as Lemma A.3.

Since all the other results are established on the basis of these two lemmas, we can see that the conclusion still holds under (19).

## 58 Appendix B Proof of Theorems

59 We first prove the deterministic case (Theorem 3.1), then generalize the result to stochastic case  
 60 (Theorem 3.2). In deterministic case we can use fewer notations, which will make the proof more  
 61 readable and elegant. The proof in stochastic case will rely on all the techniques used in the deter-  
 62 ministic case, as well as some new methods.

### 63 B.1 Proof of Theorem 3.1

64 To simplify the notation, we write the update formula as

$$\begin{aligned} m^+ &= \beta m + (1 - \beta) \nabla F(x) \\ x^+ &= x - \left( \nu \min \left( \eta, \frac{\gamma}{\|m^+\|} \right) m^+ + (1 - \nu) \min \left( \eta, \frac{\gamma}{\|\nabla F(x)\|} \right) \nabla F(x) \right) \end{aligned} \quad (22)$$

65 when analyzing a single iteration. The error between  $m^+$  and  $\nabla F(x)$  is denoted as  $\delta = m^+ -$   
 66  $\nabla F(x)$ . Suppose  $\gamma \leq c/L_1$  for some constant  $c$ , and we denote  $A = 1 + e^c - \frac{e^c - 1}{c}$  and  $B = \frac{e^c - 1}{c}$ ,  
 67 just the same as in the descent inequality (Lemma A.3).

68 **Lemma B.1** *Let  $\mu \geq 0$  be a real constant. For any vector  $u$  and  $v$ ,*

$$-\frac{\langle u, v \rangle}{\|v\|} \leq -\mu \|u\| - (1 - \mu) \|v\| + (1 + \mu) \|v - u\| \quad (23)$$

**Proof:**

$$\begin{aligned} -\frac{\langle u, v \rangle}{\|v\|} &= -\|v\| + \frac{\langle v - u, v \rangle}{\|v\|} \\ &\leq -\|v\| + \|v - u\| \\ &\leq -\|v\| + \|v - u\| + \mu(\|v - u\| + \|v\| - \|u\|) \\ &= -\mu \|u\| - (1 - \mu) \|v\| + (1 + \mu) \|v - u\| \end{aligned}$$

69

□

70 To prove the theorem, we will construct an *energy function* and explore the decreasing property of  
 71 this function. We define the energy function  $G(x, m)$  to be

$$G(x, m) = F(x) + \frac{\nu\beta}{2(1-\beta)} \min(\eta \|m\|^2, \gamma \|m\|) \quad (24)$$

72 and analyze  $G(x^+, m^+) - G(x, m)$ . We first bound  $\min(\eta \|m^+\|^2, \gamma \|m^+\|) - \min(\eta \|m\|^2, \gamma \|m\|)$ .

73 **Lemma B.2** *For any momentum vectors  $m$  and  $m^+ = \beta m + (1 - \beta) \nabla F(x)$ , let  $\delta = m^+ - \nabla F(x)$ ,*  
 74 *then*

$$\min(\eta \|m^+\|^2, \gamma \|m^+\|) - \min(\eta \|m\|^2, \gamma \|m\|) \leq \frac{2(1-\beta)}{\beta} \gamma \|\delta\| \quad (25)$$

75 **Proof:** Consider the following three cases:

76 •  $\|m\| \geq \gamma/\eta$ . In this case

$$\begin{aligned} \min(\eta \|m^+\|^2, \gamma \|m^+\|) - \min(\eta \|m\|^2, \gamma \|m\|) &\leq \gamma \|m^+\| - \gamma \|m\| \\ &\leq \gamma \|m^+ - m\| \\ &= \frac{1-\beta}{\beta} \gamma \|\delta\| \end{aligned}$$

77 •  $\|m\| < \gamma/\eta$  and  $\|m^+\| < \gamma/\eta$ . In this case

$$\begin{aligned} \min(\eta \|m^+\|^2, \gamma \|m^+\|) - \min(\eta \|m\|^2, \gamma \|m\|) &= \eta \|m^+\|^2 - \eta \|m\|^2 \\ &= \eta (\|m^+\| - \|m\|)(\|m^+\| + \|m\|) \\ &\leq \frac{2(1-\beta)}{\beta} \gamma \|\delta\| \end{aligned}$$

78 •  $\|m\| < \gamma/\eta$  and  $\|m^+\| > \gamma/\eta$ . In this case

$$\begin{aligned} \min(\eta\|m^+\|^2, \gamma\|m^+\|) - \min(\eta\|m\|^2, \gamma\|m\|) &= \gamma\|m^+\| - \eta\|m\|^2 \\ &\leq \gamma\|m^+\| - \left[2\gamma\|m\| - \frac{\gamma^2}{\eta}\right] \\ &\leq \gamma\|m^+\| - 2\gamma\|m\| + \gamma\|m^+\| \\ &= 2\gamma(\|m^+\| - \|m\|) \leq \frac{2(1-\beta)}{\beta}\gamma\|\delta\| \end{aligned}$$

79 Thus in all cases  $\min(\eta\|m^+\|^2, \gamma\|m^+\|) - \min(\eta\|m\|^2, \gamma\|m\|)$  can be upper bounded by  
80  $\frac{2(1-\beta)}{\beta}\gamma\|\delta\|$ .  $\square$

81 **Lemma B.3** Suppose  $\max(\|\nabla F(x)\|, \|m^+\|, \|m\|) \geq \gamma/\eta$ . Then

$$G(x^+, m^+) - G(x, m) \leq -\frac{2}{5}\gamma\|\nabla F(x)\| - \frac{3}{5}\frac{\gamma^2}{\eta} + \frac{12}{5\beta}\gamma\|\delta\| + \frac{AL_0 + BL_1\|\nabla F(x)\|}{2}\gamma^2 \quad (26)$$

82 **Proof:** We first write  $G(x^+, m^+) - G(x, m)$  as

$$\begin{aligned} &G(x^+, m^+) - G(x, m) \\ &= (F(x^+) - F(x)) + \frac{\nu\beta}{2(1-\beta)} [\min(\eta\|m^+\|^2, \gamma\|m^+\|) - \min(\eta\|m\|^2, \gamma\|m\|)] \end{aligned} \quad (27)$$

83 Based on Lemma B.2, we only need to bound  $F(x^+) - F(x)$ . We will use the  $(L_0, L_1)$ -smoothness  
84 assumption.

$$\begin{aligned} &F(x^+) - F(x) \\ &\leq \langle x^+ - x, \nabla F(x) \rangle + \frac{AL_0 + BL_1\|\nabla F(x)\|}{2}\|x^+ - x\|^2 \\ &= -\left[\nu \min\left(\eta, \frac{\gamma}{\|m^+\|}\right) \langle m^+, \nabla F(x) \rangle + (1-\nu) \min\left(\eta, \frac{\gamma}{\|\nabla F(x)\|}\right) \langle \nabla F(x), \nabla F(x) \rangle\right] \\ &\quad + \frac{AL_0 + BL_1\|\nabla F(x)\|}{2}\gamma^2 \\ &\leq \nu \left[-\frac{2}{5}\gamma\|\nabla F(x)\| - \frac{3}{5}\frac{\gamma^2}{\eta} + \left(\frac{12}{5\beta} - 1\right)\gamma\|\delta\|\right] + (1-\nu) \left[-\frac{2}{5}\gamma\|\nabla F(x)\| - \frac{3}{5}\frac{\gamma^2}{\eta} + \frac{8}{5\beta}\gamma\|\delta\|\right] \\ &\quad + \frac{AL_0 + BL_1\|\nabla F(x)\|}{2}\gamma^2 \end{aligned} \quad (28)$$

85 Where the first inequality uses the descent inequality (Lemma A.3), the second equation follows  
86 from the update rule, and the last inequality is obtained by the following two inequalities:

$$-\min\left(\eta, \frac{\gamma}{\|m^+\|}\right) \langle m^+, \nabla F(x) \rangle \leq -\frac{2}{5}\gamma\|\nabla F(x)\| - \frac{3}{5}\frac{\gamma^2}{\eta} + \left(\frac{12}{5\beta} - 1\right)\gamma\|\delta\| \quad (29)$$

$$-\min\left(\eta, \frac{\gamma}{\|\nabla F(x)\|}\right) \|\nabla F(x)\|^2 \leq -\frac{2}{5}\gamma\|\nabla F(x)\| - \frac{3}{5}\frac{\gamma^2}{\eta} + \frac{8}{5\beta}\gamma\|\delta\| \quad (30)$$

87 First we prove that (29) holds by considering the following three cases:

88 •  $\|m^+\| \geq \gamma/\eta$ . In this case the algorithm performs a normalized update. Then (29) follows  
89 by directly using Lemma B.1 with  $\mu = 2/5$ :

$$\begin{aligned} -\min\left(\eta, \frac{\gamma}{\|m^+\|}\right) \langle m^+, \nabla F(x) \rangle &= -\left\langle \nabla F(x), \frac{\gamma m^+}{\|m^+\|} \right\rangle \\ &\leq -\frac{2}{5}\gamma\|\nabla F(x)\| - \frac{3}{5}\gamma\|m^+\| + \frac{7}{5}\gamma\|\delta\| \end{aligned}$$

- 90 •  $\|m^+\| < \gamma/\eta$  and  $\|\nabla F(x)\| \geq \gamma/\eta$ . In this case the algorithm performs an unnormalized  
 91 update. We now prove  $-\eta \langle \nabla F(x), m^+ \rangle \leq -\frac{2}{5}\gamma\|\nabla F(x)\| - \frac{3\gamma^2}{5\eta} + \frac{7}{5}\gamma\|\nabla F(x) - m^+\|$ .

$$\begin{aligned}
 & \eta \langle \nabla F(x), m^+ \rangle - \frac{2}{5}\gamma\|\nabla F(x)\| - \frac{3\gamma^2}{5\eta} + \frac{7}{5}\gamma\|\nabla F(x) - m^+\| \\
 & \geq \eta \langle \nabla F(x), m^+ \rangle - \frac{2}{5}\gamma\|\nabla F(x)\| - \frac{3\gamma^2}{5\eta} + \frac{7}{5}\gamma \left( \|\nabla F(x)\| - \frac{\langle \nabla F(x), m^+ \rangle}{\|\nabla F(x)\|} \right) \\
 & = \|\nabla F(x)\| \left( \gamma + \eta \frac{\langle \nabla F(x), m^+ \rangle}{\|\nabla F(x)\|} \right) - \frac{7}{5}\gamma \frac{\langle \nabla F(x), m^+ \rangle}{\|\nabla F(x)\|} - \frac{3\gamma^2}{5\eta} \\
 & \geq \frac{\gamma^2}{\eta} + \gamma \frac{\langle \nabla F(x), m^+ \rangle}{\|\nabla F(x)\|} - \frac{7}{5}\gamma \frac{\langle \nabla F(x), m^+ \rangle}{\|\nabla F(x)\|} - \frac{3\gamma^2}{5\eta} \\
 & \geq \frac{2\gamma^2}{5\eta} - \frac{2}{5}\gamma\|m^+\| \geq 0
 \end{aligned}$$

- 92 •  $\|m^+\| < \gamma/\eta$  and  $\|\nabla F(x)\| < \gamma/\eta$ . This is the most complicated case. Due to the condi-  
 93 tion in Lemma B.3,  $\|m\| \geq \gamma/\eta$ . In this case, the algorithm also performs an unnormalized  
 94 update. We first bound  $\eta \langle \nabla F(x), m \rangle$  using the same calculation as in the second case:

$$\begin{aligned}
 -\eta \langle \nabla F(x), m \rangle & \leq -\frac{2}{5}\gamma\|m\| - \frac{3\gamma^2}{5\eta} + \frac{7}{5}\gamma\|\nabla F(x) - m\| \\
 & \leq -\frac{2}{5}\gamma\|\nabla F(x)\| - \frac{3\gamma^2}{5\eta} + \frac{7}{5\beta}\gamma\|\delta\|
 \end{aligned}$$

95 where we use the fact that  $\|\nabla F(x) - m\| = \|\delta\|/\beta$ . We then bound  $\eta\|\nabla F(x)\|^2$  as follows:

$$\begin{aligned}
 -\eta\|\nabla F(x)\|^2 & \leq -2\gamma\|\nabla F(x)\| + \frac{\gamma^2}{\eta} \\
 & = -\frac{2}{5}\gamma\|\nabla F(x)\| - \frac{3\gamma^2}{5\eta} + \frac{8}{5} \left( \frac{\gamma^2}{\eta} - \gamma\|\nabla F(x)\| \right) \\
 & \leq -\frac{2}{5}\gamma\|\nabla F(x)\| - \frac{3\gamma^2}{5\eta} + \frac{8}{5}\gamma(\|m\| - \|\nabla F(x)\|) \\
 & \leq -\frac{2}{5}\gamma\|\nabla F(x)\| - \frac{3\gamma^2}{5\eta} + \frac{8}{5\beta}\|\delta\|
 \end{aligned}$$

96 Combining the two inequalities, we obtain

$$\begin{aligned}
 -\langle \nabla F(x), \eta m^+ \rangle & = -\eta \langle \nabla F(x), \beta m + (1 - \beta)\nabla F(x) \rangle \\
 & \leq -\frac{2}{5}\gamma\|\nabla F(x)\| - \frac{3\gamma^2}{5\eta} + \left( \frac{7}{5\beta}\beta + \frac{8}{5\beta}(1 - \beta) \right) \|\delta\| \\
 & \leq -\frac{2}{5}\gamma\|\nabla F(x)\| - \frac{3\gamma^2}{5\eta} + \left( \frac{12}{5\beta} - 1 \right) \|\delta\|
 \end{aligned}$$

97 Thus in all cases (29) holds. We now turn to (30) which is proven in a similar fashion. Specifically,  
 98 consider the following three cases:

- $\|\nabla F(x)\| \geq \gamma/\eta$ . In this case

$$-\min \left( \eta, \frac{\gamma}{\|\nabla F(x)\|} \right) \|\nabla F(x)\|^2 = -\gamma\|\nabla F(x)\|^2 \leq -\frac{2}{5}\gamma\|\nabla F(x)\| - \frac{3\gamma^2}{5\eta}$$

99  
100

- $\|\nabla F(x)\| < \gamma/\eta$  and  $\|m^+\| \geq \gamma/\eta$ . In this case bound  $\eta\|\nabla F(x)\|^2$  the same as in the third case of (29):

$$\begin{aligned}
-\min\left(\eta, \frac{\gamma}{\|\nabla F(x)\|}\right) \|\nabla F(x)\|^2 &= -\eta\|\nabla F(x)\|^2 \\
&\leq -\frac{2}{5}\gamma\|\nabla F(x)\| - \frac{3\gamma^2}{5\eta} + \frac{8}{5}\left(\frac{\gamma^2}{\eta} - \gamma\|\nabla F(x)\|\right) \\
&\leq -\frac{2}{5}\gamma\|\nabla F(x)\| - \frac{3\gamma^2}{5\eta} + \frac{8}{5}\gamma(\|m^+\| - \|\nabla F(x)\|) \\
&\leq -\frac{2}{5}\gamma\|\nabla F(x)\| - \frac{3\gamma^2}{5\eta} + \frac{8}{5}\gamma\|\delta\|
\end{aligned}$$

101  
102

- $\|\nabla F(x)\| < \gamma/\eta$  and  $\|m^+\| < \gamma/\eta$ . In this case  $\|m\| \geq \gamma/\eta$ . Using the same calculation above,

$$-\min\left(\eta, \frac{\gamma}{\|\nabla F(x)\|}\right) \|\nabla F(x)\|^2 \leq -\frac{2}{5}\gamma\|\nabla F(x)\| - \frac{3\gamma^2}{5\eta} + \frac{8}{5\beta}\gamma\|\delta\|$$

103 Thus (30) holds. Merging all the cases above, we finally obtain

$$G(x^+, m^+) - G(x, m) \leq \left[-\frac{2}{5}\gamma\|\nabla F(x)\| - \frac{3}{5}\frac{\gamma^2}{\eta} + \frac{12}{5\beta}\gamma\|\delta\|\right] + \frac{AL_0 + BL_1\|\nabla F(x)\|}{2}\gamma^2 \quad (31)$$

104

□

105 Now we consider all the steps  $t$  which satisfy the condition in Lemma B.3, denoted as  $\mathcal{S} = \{t \in$   
106  $[0, T-1] : \max(\|F(x_t)\|, \|m_{t+1}\|, \|m_t\|) \geq \gamma/\eta\}$ . Similarly, use  $\bar{\mathcal{S}} = [0, T-1] \setminus \mathcal{S}$ . Let  $T_{\mathcal{S}} = |\mathcal{S}|$ ,  
107 then  $T - T_{\mathcal{S}} = |\bar{\mathcal{S}}|$ .

108 **Corollary B.4** *Let set  $\mathcal{S}$  and  $T_{\mathcal{S}}$  be defined above. Then*

$$\begin{aligned}
&\sum_{t \in \mathcal{S}} G(x_{t+1}, m_{t+1}) - G(x_t, m_t) \\
&\leq \frac{12\gamma}{5\beta(1-\beta)}\|\delta_0\| + \left(\frac{12}{5(1-\beta)}AL_0 + \frac{12\gamma}{5\eta(1-\beta)}BL_1 + \frac{1}{2}AL_0\right)\gamma^2 T_{\mathcal{S}} + \\
&\quad \gamma \sum_{t \in \mathcal{S}} \left[-\frac{1}{5}(2\|\nabla F(x_t)\| + 3\frac{\gamma}{\eta}) + \frac{\gamma}{2}BL_1\|\nabla F(x_t)\| + \frac{12\gamma}{5(1-\beta)}BL_1\|\nabla F(x_t)\|\right]
\end{aligned} \quad (32)$$

109 **Proof:** Using Lemma B.3,

$$\begin{aligned}
&\sum_{t \in \mathcal{S}} G(x_{t+1}, m_{t+1}) - G(x_t, m_t) \\
&\leq -\sum_{t \in \mathcal{S}} \left[\frac{\gamma}{5}(2\|\nabla F(x_t)\| + 3\frac{\gamma}{\eta}) - \frac{\gamma^2}{2}BL_1\|\nabla F(x_t)\| - \frac{12}{5\beta}\gamma\|\delta_t\|\right] + \frac{\gamma^2}{2}AL_0 T_{\mathcal{S}}
\end{aligned} \quad (33)$$

110 We now focus on the summation of the term  $\|\delta_t\|$ . Define  $S(a, b) = \nabla F(a) - \nabla F(b)$ . When  
111  $\|a - b\| \leq \gamma$ ,  $\|S(a, b)\| \leq \gamma(AL_0 + BL_1\|\nabla F(b)\|)$  (see Lemma A.4). Thus we can expand

112  $\delta_t = m_{t+1} - \nabla F(x_t)$  using the recursive relation  $\delta_t = \beta\delta_{t-1} + \beta S(x_{t-1}, x_t)$  as follows

$$\begin{aligned}
\sum_{t \in \mathcal{S}} \|\delta_t\| &= \sum_{t \in \mathcal{S}} \left\| \beta^t \delta_0 + \beta \sum_{\tau=0}^{t-1} \beta^\tau S(x_{t-\tau-1}, x_{t-\tau}) \right\| \\
&\leq \sum_{t \in \mathcal{S}} \beta^t \|\delta_0\| + \beta \sum_{t \in \mathcal{S}} \sum_{\tau=0}^{t-1} \beta^\tau \gamma (AL_0 + BL_1 \|\nabla F(x_{t-\tau})\|) \\
&\leq \frac{1}{1-\beta} \|\delta_0\| + \frac{\beta}{1-\beta} (AL_0 \gamma T_{\mathcal{S}} + \\
&\quad BL_1 \gamma \sum_{t \in \mathcal{S}} \left( \sum_{\tau \in [1, t] \setminus \mathcal{S}} \beta^{t-\tau+1} \|\nabla F(x_\tau)\| + \sum_{\tau \in [1, t] \cap \mathcal{S}} \beta^{t-\tau+1} \|\nabla F(x_\tau)\| \right) \\
&\leq \frac{\beta}{1-\beta} \left( \frac{\|\delta_0\|}{\beta} + AL_0 \gamma T_{\mathcal{S}} + BL_1 \frac{\gamma^2}{\eta} T_{\mathcal{S}} + BL_1 \gamma \sum_{t \in \mathcal{S}} \|\nabla F(x_t)\| \right)
\end{aligned}$$

113 where the last inequality uses the fact that  $\|\nabla F(x_\tau)\| \leq \gamma/\eta$  for all  $\tau \in [1, t] \setminus \mathcal{S}$ .

114 After substituting the above results into (33) we obtain

$$\begin{aligned}
&\sum_{t \in \mathcal{S}} G(x_{t+1}, m_{t+1}) - G(x_t, m_t) \\
&\leq \frac{12\gamma}{5\beta(1-\beta)} \|\delta_0\| + \left( \frac{12}{5(1-\beta)} AL_0 + \frac{12\gamma}{5\eta(1-\beta)} BL_1 + \frac{1}{2} AL_0 \right) \gamma^2 T_{\mathcal{S}} + \\
&\quad \gamma \sum_{t \in \mathcal{S}} \left[ -\frac{1}{5} (2\|\nabla F(x_t)\| + 3\frac{\gamma}{\eta}) + \frac{\gamma}{2} BL_1 \|\nabla F(x_t)\| + \frac{12\gamma}{5(1-\beta)} BL_1 \|\nabla F(x_t)\| \right]
\end{aligned} \tag{34}$$

115

□

116 Now we turn to the case in which  $\max(\|\nabla F(x)\|, \|m^+\|, \|m\|) \leq \gamma/\eta$ .

117 **Lemma B.5** Suppose  $\max(\|\nabla F(x)\|, \|m^+\|, \|m\|) \leq \gamma/\eta$ . Then

$$G(x^+, m^+) - G(x, m) \leq -\frac{\eta}{2} (c_1 \|\nabla F(x)\|^2 + 2c_2 \langle \nabla F(x), m \rangle + c_3 \|m\|^2) \tag{35}$$

118 where  $c_1 = \nu(1-\beta)(2-\beta) - L\eta(1-\beta\nu)^2 + 2(1-\nu)$ ,  $c_2 = \nu\beta(1-\beta) - L\eta\beta\nu(1-\beta\nu)$ ,  $c_3 =$   
119  $\nu\beta(1+\beta) - L\eta(\beta\nu)^2$ , and  $L = AL_0 + BL_1\gamma/\eta$ .

120 **Proof:** In the case of  $\|m\| \leq \gamma/\eta$ , we have  $\eta\|m\|^2 \leq \gamma\|m\|$ , thus

$$G(x^+, m^+) - G(x, m) = (F(x^+) - F(x)) + \frac{\nu\beta\eta}{2(1-\beta)} (\|m^+\|^2 - \|m\|^2) \tag{36}$$

121 We then bound  $F(x^+) - F(x)$  and  $\|m^+\|^2 - \|m\|^2$ . Note that  $\|m^+\| \leq \gamma/\eta$  implies that the  
122 algorithm performs an update without normalization. Define  $L := AL_0 + BL_1\gamma/\eta$ , then again by  
123 descent inequality,

$$\begin{aligned}
F(x^+) - F(x) &\leq \langle x^+ - x, \nabla F(x) \rangle + \frac{AL_0 + BL_1 \|\nabla F(x)\|}{2} \|x^+ - x\|^2 \\
&= -[\nu\eta \langle m^+, \nabla F(x) \rangle + (1-\nu)\eta \|\nabla F(x)\|^2] + \\
&\quad \frac{AL_0 + BL_1 \|\nabla F(x)\|}{2} \eta^2 \|(1-\beta\nu)\nabla F(x) + \beta\nu m\|^2 \\
&\leq -[\nu\eta \langle m^+, \nabla F(x) \rangle + (1-\nu)\eta \|\nabla F(x)\|^2] + \frac{L}{2} \eta^2 \|(1-\beta\nu)\nabla F(x) + \beta\nu m\|^2 \\
&\stackrel{\text{Rearranging}}{\leq} -\left[ \nu(1-\beta)\eta + (1-\nu)\eta - \frac{L}{2} \eta^2 (1-\beta\nu)^2 \right] \|\nabla F(x)\|^2 \\
&\quad - [\nu\beta\eta - L\eta^2(\beta\nu)(1-\beta\nu)] \langle \nabla F(x), m \rangle + \frac{L}{2} \eta^2 \beta^2 \nu^2 \|m\|^2
\end{aligned} \tag{37}$$



124 Since

$$\|m^+\|^2 - \|m\|^2 = (1 - \beta)^2 \|\nabla F(x)\|^2 - (1 + \beta)(1 - \beta) \|m\|^2 + 2\beta(1 - \beta) \langle \nabla F(x), m \rangle \quad (38)$$

by definition of the energy function, we have

$$G(x^+, m^+) - G(x, m) \leq -\frac{\eta}{2} (c_1 \|\nabla F(x)\|^2 + 2c_2 \langle \nabla F(x), m \rangle + c_3 \|m\|^2)$$

125 where  $c_1 = \nu(1 - \beta)(2 - \beta) - L\eta(1 - \beta\nu)^2 + 2(1 - \nu)$ ,  $c_2 = \nu\beta(1 - \beta) - L\eta\beta\nu(1 - \beta\nu)$ ,  $c_3 =$   
126  $\nu\beta(1 + \beta) - L\eta(\beta\nu)^2$ .  $\square$

**Lemma B.6** Let  $c_1, c_2, c_3$  and  $L$  be defined in Lemma B.5. If  $L\eta \leq 1$ , then the matrix

$$H = \begin{pmatrix} [c_1 - (1 - \nu\beta)]I_d & c_2 I_d \\ c_2 I_d & (c_3 - \nu\beta)I_d \end{pmatrix}$$

127 is symmetric and positive semi-definite, where  $I_d$  is the  $d \times d$  identity matrix.

**Proof:** In fact we only need to consider the case when  $d = 1$ , because the eigenvalues of  $H_{2d \times 2d}$  can only be those that appears in  $H_{2 \times 2}$  ( $d = 1$ ). Denote two eigenvalues be  $\lambda_1, \lambda_2$  when  $d = 1$ . A direct calculation shows that

$$\lambda_1 \lambda_2 = \det H = [c_1 - (1 - \nu\beta)](c_3 - \nu\beta) - c_2^2 = \nu(1 - \nu)\beta^2(1 - L\eta)$$

$$\lambda_1 + \lambda_2 = c_1 + c_3 - 1 = (1 - \nu\beta)^2(1 - L\eta) + (\nu\beta)^2(1 - L\eta) + 2\beta^2\nu(1 - \nu)$$

128 If  $L\eta \leq 1$ , then  $\lambda_1 \lambda_2 \geq 0$  and  $\lambda_1 + \lambda_2 \geq 0$ , which is equivalent to the semi-definiteness of  $H$ .  $\square$

129 **Corollary B.7** Suppose  $\max(\|\nabla F(x)\|, \|m\|, \|m^+\|) \leq \gamma/\eta$ . If  $L\eta \leq 1$ , Then

$$G(x^+, m^+) - G(x, m) \leq -\frac{\eta}{2}(1 - \nu\beta)\|\nabla F(x)\|^2 - \frac{\eta}{2}\nu\beta\|m\|^2 \quad (39)$$

130 **Proof:** Let  $H$  be defined in Lemma B.6. The result of Lemma B.5 can be written in a matrix form:

$$G(x^+, m^+) - G(x, m) \leq -\frac{\eta}{2}(1 - \nu\beta)\|\nabla F(x)\|^2 - \frac{\eta}{2}\nu\beta\|m\|^2 - \frac{\eta}{2}(\nabla F(x)^T, m^T) H (\nabla F(x)^T, m^T)^T \quad (40)$$

132 Using the fact that  $H$  is positive semi-definite, we obtain the desired result.  $\square$

133 Note that the amount of descent in Corollary B.7 is small in terms of  $\|\nabla F(x)\|$  if  $\beta$  and  $\nu$  are close  
134 to 1. We now try to convert the term  $\|m\|$  into  $\|\nabla F(x)\|$ , which is stated in the following lemma.

135 **Lemma B.8** Suppose  $AL_0\eta \leq c_1(1 - \beta)$  and  $BL_1\gamma \leq c_3(1 - \beta)$  for some constant  $c_1$  and  $c_3$ . Let  
136  $m_0 = \nabla F(x_0)$  for simplicity. Let set  $\mathcal{S}$  and  $\bar{\mathcal{S}}$  be defined above. Then

$$\begin{aligned} \sum_{t \in \bar{\mathcal{S}}} \|m_t\| &\geq \frac{1}{1 + c_1} \sum_{t \in \bar{\mathcal{S}}} ((1 - c_1(1 - \nu\beta) - c_3)\|\nabla F(x_t)\|) \\ &\quad - \frac{1}{1 - \beta} \sum_{t \in \mathcal{S}} (AL_0 + BL_1\|\nabla F(x_t)\|)\gamma \end{aligned} \quad (41)$$

137 **Proof:** For any  $t \geq 1$ , we have

$$\begin{aligned} \|m_t - \nabla F(x_t)\| &\leq \|m_t - \nabla F(x_{t-1})\| + \|\nabla F(x_{t-1}) - \nabla F(x_t)\| \\ &\leq \beta\|m_{t-1} - \nabla F(x_{t-1})\| + (AL_0 + BL_1\|\nabla F(x_{t-1})\|) \times \\ &\quad \left( \nu \min\left(\eta, \frac{\gamma}{\|m_t\|}\right) \|m_t\| + (1 - \nu) \min\left(\eta, \frac{\gamma}{\|\nabla F(x_{t-1})\|}\right) \|\nabla F(x_{t-1})\| \right) \end{aligned} \quad (42)$$

138 where the last inequality follows by Corollary A.4. Applying (42) recursively, we obtain

$$\begin{aligned} \|m_t - \nabla F(x_t)\| &\leq \sum_{\tau=1}^t \beta^{t-\tau} (AL_0 + BL_1\|\nabla F(x_{\tau-1})\|) \times \\ &\quad \left( \nu \min\left(\eta, \frac{\gamma}{\|m_\tau\|}\right) \|m_\tau\| + (1 - \nu) \min\left(\eta, \frac{\gamma}{\|\nabla F(x_{\tau-1})\|}\right) \|\nabla F(x_{\tau-1})\| \right) \end{aligned} \quad (43)$$

139 Therefore,

$$\begin{aligned}
& \sum_{t=0}^{T-1} \|m_t - \nabla F(x_t)\| \\
& \leq \frac{1}{1-\beta} \sum_{t=0}^{T-1} (AL_0 + BL_1 \|\nabla F(x_t)\|) \left( \nu \min \left( \eta, \frac{\gamma}{\|m_{t+1}\|} \right) \|m_{t+1}\| + (1-\nu) \min \left( \eta, \frac{\gamma}{\|\nabla F(x_t)\|} \right) \|\nabla F(x_t)\| \right) \\
& \leq \frac{1}{1-\beta} \left( \sum_{t=0}^{T-1} BL_1 \gamma \|\nabla F(x_t)\| + \sum_{t \in \mathcal{S}} AL_0 \gamma + \sum_{t \in \bar{\mathcal{S}}} AL_0 \eta ((1-\nu) \|\nabla F(x_t)\| + \nu \|m_{t+1}\|) \right)
\end{aligned} \tag{44}$$

140 Therefore we obtain

$$\begin{aligned}
& \sum_{t=0}^{T-1} \|m_t - \nabla F(x_t)\| \\
& \leq \frac{1}{1-\beta} \left( \sum_{t \in \mathcal{S}} (AL_0 + BL_1 \|\nabla F(x_t)\|) \gamma + \sum_{t \in \bar{\mathcal{S}}} [AL_0 \nu \eta \|m_{t+1}\| + (BL_1 \gamma + AL_0 (1-\nu) \eta) \|\nabla F(x_t)\|] \right) \\
& \leq \frac{1}{1-\beta} \left( \sum_{t \in \mathcal{S}} (AL_0 + BL_1 \|\nabla F(x_t)\|) \gamma \right) + \\
& \quad \frac{1}{1-\beta} \left( \sum_{t \in \bar{\mathcal{S}}} AL_0 \nu \eta \beta \|m_t\| + (AL_0 \eta (1-\nu \beta) + BL_1 \gamma) \|\nabla F(x_t)\| \right) \\
& \leq \frac{1}{1-\beta} \left( \sum_{t \in \mathcal{S}} (AL_0 + BL_1 \|\nabla F(x_t)\|) \gamma \right) + \left( \sum_{t \in \bar{\mathcal{S}}} (c_1 (1-\nu \beta) + c_3) \|\nabla F(x_t)\| + c_1 \nu \beta \|m_t\| \right)
\end{aligned} \tag{45}$$

141 Using  $\|m_t\| \geq \|\nabla F(x_t)\| - \|m_t - \nabla F(x_t)\|$  and some straightforward calculation, we obtain

$$\begin{aligned}
(1 + c_1) \sum_{t \in \bar{\mathcal{S}}} \|m_t\| & \geq \left( \sum_{t \in \bar{\mathcal{S}}} (1 - c_1 (1-\nu \beta) - c_3) \|\nabla F(x_t)\| \right) \\
& \quad - \frac{1}{1-\beta} \left( \sum_{t \in \mathcal{S}} (AL_0 + BL_1 \|\nabla F(x_t)\|) \gamma \right)
\end{aligned} \tag{46}$$

142

□

143 Now we are ready to prove the main theorem.

**Theorem B.9** Let  $F^*$  be the optimal value, and  $\Delta = F(x_0) - F^*$ . Assume  $m_0 = \nabla F(x_0)$  for simplicity. If  $\gamma \leq \frac{1-\beta}{10BL_1}$  and  $\eta \leq \frac{1-\beta}{10AL_0}$ , where constants  $A = 1 + e^{1/10} - 10(e^{1/10} - 1) < 1.06$ ,  $B = 10(e^{1/10} - 1) < 1.06$ , and  $\varepsilon < \frac{\gamma}{5\eta}$ , then

$$\frac{1}{T} \sum_{t=1}^T \|\nabla F(x_t)\| \leq 2\varepsilon$$

144 as long as

$$T \geq \frac{3}{\varepsilon^2 \eta} \Delta \tag{47}$$

145 **Proof:** By calculating  $L\eta = AL_0\eta + BL_1\gamma \leq (1-\beta)/5 < 1$ , we can use Corollary B.7. Taking  
146 summation of the inequality (39) over steps  $t \in \bar{\mathcal{S}} = [0, T-1] \setminus \mathcal{S}$ , we obtain

$$\sum_{t \in \bar{\mathcal{S}}} G(x_{t+1}, m_{t+1}) - G(x_t, m_t) \leq -\frac{\eta}{2} \sum_{t \in \bar{\mathcal{S}}} ((1-\nu\beta) \|\nabla F(x_t)\|^2 + \nu\beta \|m_t\|^2) \tag{48}$$

147 Combining (48) and (32) in Corollary B.4 we obtain

$$\begin{aligned}
G(x_T, m_T) - G(x_0, m_0) &= \sum_{t=0}^{T-1} G(x_{t+1}, m_{t+1}) - G(x_t, m_t) \\
&\leq -\frac{\eta}{2} \sum_{t \in \bar{\mathcal{S}}} ((1 - \nu\beta) \|\nabla F(x_t)\|^2 + \nu\beta \|m_t\|^2) + \\
&\quad \frac{12\gamma}{5\beta(1-\beta)} \|\delta_0\| + \left( \frac{12}{5(1-\beta)} AL_0 + \frac{12\gamma}{5\eta(1-\beta)} BL_1 + \frac{1}{2} AL_0 \right) \gamma^2 T_S + \\
&\quad \gamma \sum_{t \in \mathcal{S}} \left[ -\frac{1}{5} (2\|\nabla F(x_t)\| + 3\frac{\gamma}{\eta}) + \left( \frac{1}{2} + \frac{12}{5(1-\beta)} \right) BL_1 \gamma \|\nabla F(x_t)\| \right]
\end{aligned} \tag{49}$$

148 By the assumption

$$\gamma \leq \frac{1-\beta}{10BL_1}, \quad \eta \leq \frac{1-\beta}{10AL_0} \tag{50}$$

149 we have  $AL_0\eta \leq (1-\beta)/10$  and  $BL_1\gamma \leq (1-\beta)/10$ . Using Lemma B.14 we have

$$\sum_{t \in \bar{\mathcal{S}}} \|m_t\| \geq \frac{8}{11} \sum_{t \in \bar{\mathcal{S}}} \|\nabla F(x_t)\| - \frac{1}{1-\beta} \left( \sum_{t \in \mathcal{S}} (AL_0 + BL_1 \|\nabla F(x_t)\|) \gamma \right) \tag{51}$$

150 Therefore by standard inequality  $x^2 \geq 2\varepsilon x - \varepsilon^2$  and (49) we obtain

$$\begin{aligned}
&G(x_0, m_0) - G(x_T, m_T) \\
&\geq \frac{\eta}{2} \sum_{t \in \bar{\mathcal{S}}} ((1 - \nu\beta) \|\nabla F(x_t)\|^2 + 2\nu\beta\varepsilon \|m_t\| - \nu\beta\varepsilon^2) \\
&\quad + \left( \frac{3}{5} \frac{\gamma^2}{\eta} - \left( \frac{12}{5(1-\beta)} AL_0 + \frac{12\gamma}{5\eta(1-\beta)} BL_1 + \frac{1}{2} AL_0 \right) \gamma^2 \right) T_S \\
&\quad + \gamma \left( \frac{2}{5} - \left( \frac{1}{2} + \frac{12}{5(1-\beta)} \right) BL_1 \gamma \right) \sum_{t \in \mathcal{S}} \|\nabla F(x_t)\| \\
&\geq \sum_{t \in \mathcal{S}} U(x_t) + \sum_{t \in \bar{\mathcal{S}}} V(x_t)
\end{aligned} \tag{52}$$

151 Where

$$\begin{aligned}
U(x) &:= \left( \frac{3}{5} \frac{\gamma^2}{\eta} - \left( \frac{12}{5(1-\beta)} AL_0 + \frac{12\gamma}{5\eta(1-\beta)} BL_1 + \frac{1}{2} AL_0 \right) \gamma^2 - \frac{\nu\beta}{1-\beta} AL_0 \varepsilon \gamma \eta \right) \\
&\quad + \gamma \left( \frac{2}{5} - \left( \frac{1}{2} + \frac{12}{5(1-\beta)} \right) BL_1 \gamma - \frac{\nu\beta}{1-\beta} \varepsilon \eta BL_1 \right) \|\nabla F(x)\| \\
V(x) &:= \frac{\eta}{2} (1 - \nu\beta) \|\nabla F(x)\|^2 + \frac{8}{11} \nu\beta \varepsilon \eta \|\nabla F(x)\| - \frac{1}{2} \nu\beta \varepsilon^2 \eta
\end{aligned} \tag{53}$$

152 We now simplify  $U(x)$ . Let  $\varepsilon \leq \frac{\gamma}{5\eta}$ . By (50) we have

$$\begin{aligned}
\frac{2}{5} - \left( \frac{1}{2} + \frac{12}{5(1-\beta)} \right) BL_1 \gamma - \frac{\nu\beta}{1-\beta} \varepsilon \eta BL_1 &\geq \frac{2}{5} - \frac{12}{50} - \frac{1}{20} \geq \frac{1}{10} \\
\frac{3}{5} - \frac{12\gamma}{5(1-\beta)} BL_1 &\geq \frac{3}{10}
\end{aligned} \tag{54}$$

153 Therefore

$$\begin{aligned}
U(x) &\geq \frac{3}{10} \frac{\gamma^2}{\eta} - \left( \frac{12}{5(1-\beta)} + \frac{1}{2} \right) AL_0 \gamma^2 - \frac{\nu\beta}{1-\beta} AL_0 \varepsilon \gamma \eta + \frac{1}{10} \gamma \|\nabla F(x)\| \\
&\geq \left( \frac{3}{5(1-\beta)} - \frac{1}{2} \right) AL_0 \gamma^2 - \frac{\nu\beta}{1-\beta} AL_0 \varepsilon \gamma \eta + \frac{1}{10} \gamma \|\nabla F(x)\| \\
&\geq \frac{1}{10(1-\beta)} AL_0 \gamma^2 + \frac{1}{10} \gamma \|\nabla F(x)\|
\end{aligned} \tag{55}$$

154 We can also bound  $V(x)$  as follows:

$$\begin{aligned} V(x) &\geq (1 - \nu\beta)\varepsilon\eta\|\nabla F(x)\| - \frac{\eta}{2}(1 - \nu\beta)\varepsilon^2 + \frac{8}{11}\nu\beta\varepsilon\eta\|\nabla F(x)\| - \frac{1}{2}\nu\beta\varepsilon^2\eta \\ &\geq \frac{1}{2}\varepsilon\eta\|\nabla F(x)\| - \frac{1}{2}\varepsilon^2\eta \end{aligned} \quad (56)$$

155 Since  $\varepsilon < \frac{\gamma}{5\eta}$ , we have  $U(x) \geq V(x)$ . Therefore by (52) and Lemma A.5 we have

$$\begin{aligned} T \sum_{t=0}^{T-1} \frac{1}{2}\varepsilon\eta(\|\nabla F(x)\| - \varepsilon) &\leq \Delta + \frac{\beta}{2(1-\beta)} \min\{\eta\|\nabla F(x_0)\|^2, \gamma\|\nabla F(x_0)\|\} \\ &\leq \Delta + \frac{4\beta}{1-\beta} \Delta \max\{L_0\eta, L_1\gamma\} \\ &\leq \frac{7}{5}\Delta \end{aligned} \quad (57)$$

156 Thus

$$\frac{1}{T} \sum_{t=0}^{T-1} \|\nabla F(x_t)\| \leq 2\varepsilon \quad (58)$$

157 as long as

$$T > \frac{3}{\varepsilon^2\eta}\Delta \quad (59)$$

158  $\square$

## 159 B.2 Proof of Theorem 3.2

160 We now prove the stochastic case. As before, to simplify the notation we write the update formula  
161 as

$$\begin{aligned} m^+ &= \beta m + (1 - \beta)\nabla f(x, \xi) \\ x^+ &= x - \left( \nu \min\left(\eta, \frac{\gamma}{\|m^+\|}\right) m^+ + (1 - \nu) \min\left(\eta, \frac{\gamma}{\|\nabla f(x, \xi)\|}\right) \nabla f(x, \xi) \right) \end{aligned} \quad (60)$$

162 when analyzing a single iteration. The error between  $m^+$  and  $\nabla F(x)$  is denoted as  $\delta = m^+ - \nabla F(x)$ . We define the true momentum  $\tilde{m}$  as follows:

$$\tilde{m}^+ = \beta\tilde{m} + (1 - \beta)\nabla F(x) \quad (61)$$

164 where  $\tilde{m}_0 = m_0$ . Similarly, the error between  $\tilde{m}^+$  and  $\nabla F(x)$  is denoted as  $\tilde{\delta} = \tilde{m}^+ - \nabla F(x)$ .

165 In stochastic case, we define the energy function to be

$$G(x, \tilde{m}) = F(x) + \frac{\nu\beta}{2(1-\beta)} \min(\eta\|\tilde{m}\|^2, \gamma\|\tilde{m}\|) \quad (62)$$

166 The only change is that we use the true momentum  $\tilde{m}$  instead of stochastic momentum  $m$ . Note that  
167 Lemma B.1 and Lemma B.2 can still be used in stochastic case. The momentum  $m$  and error  $\delta$  in  
168 Lemma B.2 will be changed to  $\tilde{m}$  and  $\tilde{\delta}$  respectively.

169 Suppose  $\gamma \leq c/L_1$  for some constant  $c$ , and we denote  $A = 1 + e^c - \frac{e^c-1}{c}$  and  $B = \frac{e^c-1}{c}$ , just the  
170 same as in the descent inequality (Lemma A.3). When  $\gamma \leq \frac{1-\beta}{50L_1}\varepsilon \leq \frac{1}{500L_1}$  (in Theorem 3.2), we  
171 can take  $c = 1/500$  and  $A = B = 1.002$ .

172 **Lemma B.10** *The difference between  $m$  and  $\tilde{m}$  satisfies:*

$$\|m^+ - \tilde{m}^+\| \leq \sigma \quad (63)$$

173 Furthermore, in expectation

$$\mathbb{E}\|m^+ - \tilde{m}^+\|^2 \leq \frac{1-\beta}{1+\beta}\sigma \quad (64)$$

174 **Proof:** By expanding  $m_{t+1}$  and  $\tilde{m}_{t+1}$ , we get

$$\begin{aligned} \|m_{t+1} - \tilde{m}_{t+1}\| &= (1 - \beta) \left\| \sum_{\tau=0}^t \beta^{t-\tau} (\nabla f(x_\tau, \xi_\tau) - \nabla F(x_\tau)) \right\| \\ &\leq (1 - \beta) \sum_{\tau=0}^t \beta^{t-\tau} \|\nabla f(x_\tau, \xi_\tau) - \nabla F(x_\tau)\| \\ &\leq (1 - \beta) \sum_{\tau=0}^t \beta^{t-\tau} \sigma \leq \sigma \end{aligned} \quad (65)$$

Furthermore, using the noise assumption, for different time steps  $t, t'$ , we have

$$\mathbb{E}[\langle \nabla f(x_t, \xi_t) - \nabla F(x_t), \nabla f(x_{t'}, \xi_{t'}) - \nabla F(x_{t'}) \rangle] = 0$$

175 Therefore

$$\mathbb{E}[\|m_{t+1} - \tilde{m}_{t+1}\|^2] = \mathbb{E} \left[ \sum_{\tau=0}^t (1 - \beta)^2 \beta^{2(t-\tau)} \|\nabla f(x_\tau, \xi_\tau) - \nabla F(x_\tau)\|^2 \right] \leq \frac{1 - \beta}{1 + \beta} \sigma^2 \quad (66)$$

176

□

177 **Lemma B.11** Suppose  $\max(5\|\nabla F(x)\|/4, \|m^+\|, \|\tilde{m}\|) \geq \gamma/\eta$ . Then

$$\begin{aligned} &G(x^+, \tilde{m}^+) - G(x, \tilde{m}) \\ &\leq -\frac{4}{5} \times \frac{2\gamma}{5} \|\nabla F(x)\| - \frac{16}{25} \times \frac{3\gamma^2}{5\eta} + \frac{\gamma^2}{2} (AL_0 + BL_1 \|\nabla F(x)\|) + \frac{12}{5\beta} \gamma \|\tilde{\delta}\| \\ &\quad - \nu \eta \langle \nabla F(x), m^+ - \tilde{m}^+ \rangle - (1 - \nu) \eta \langle \nabla F(x), \nabla f(x, \xi) - \nabla F(x) \rangle + \left( \eta \|\nabla F(x)\| + \frac{7}{5} \gamma \right) \sigma \end{aligned} \quad (67)$$

178 **Proof:** Based on Lemma B.2, we only need to bound  $F(x^+) - F(x)$ . We use the  $(L_0, L_1)$ -smooth  
179 condition:

$$F(x^+) - F(x) \leq \langle \nabla F(x), x^+ - x \rangle + \frac{\gamma^2}{2} (AL_0 + BL_1 \|\nabla F(x)\|) \quad (68)$$

180 Now we bound  $\langle \nabla F(x), x^+ - x \rangle$ . The calculation is similar to the deterministic setting. We first  
181 bound  $-\min\left(\eta, \frac{\gamma}{\|m^+\|}\right) \langle m^+, \nabla F(x) \rangle$ . Consider the following three cases, all of which are analo-  
182 gous to the proof of Lemma B.3:

183 •  $\|m^+\| \geq \gamma/\eta$ . The algorithm performs a normalized update. We have

$$-\frac{\gamma}{\|m^+\|} \langle m^+, \nabla F(x) \rangle \leq -\frac{2}{5} \gamma \|\nabla F(x)\| - \frac{3}{5} \gamma \|m^+\| + \frac{7}{5} \gamma \|\delta\|$$

184 •  $\|m^+\| < \gamma/\eta$  and  $\|\nabla F(x)\| \geq 4\gamma/5\eta$ . The algorithm performs an unnormalized update.  
185 We have

$$-\eta \langle \nabla F(x), m^+ \rangle \leq -\frac{4}{5} \times \frac{2}{5} \gamma \|\nabla F(x)\| - \frac{16}{25} \times \frac{3\gamma^2}{5\eta} + \frac{4}{5} \times \frac{7}{5} \gamma \|\delta\|$$

186 •  $\|m^+\| < \gamma/\eta$  and  $\|\nabla F(x)\| < 4\gamma/5\eta$ . In this case  $\|\tilde{m}\| \geq \gamma/\eta$ . The algorithm performs  
187 an unnormalized update. We have

$$-\eta \langle \nabla F(x), \tilde{m}^+ \rangle \leq -\frac{2}{5} \gamma \|\nabla F(x)\| - \frac{3\gamma^2}{5\eta} + \left( \frac{12}{5\beta} - 1 \right) \gamma \|\tilde{\delta}\|$$

188 Therefore in all the cases, we have

$$\begin{aligned} -\min\left(\eta, \frac{\gamma}{\|m^+\|}\right) \langle m^+, \nabla F(x) \rangle &\leq -\frac{4}{5} \times \frac{2}{5} \gamma \|\nabla F(x)\| - \frac{16}{25} \times \frac{3\gamma^2}{5\eta} + \left( \frac{12}{5\beta} - 1 \right) \gamma \|\tilde{\delta}\| \\ &\quad - \eta \langle \nabla F(x), m^+ - \tilde{m}^+ \rangle + \left( \eta \|\nabla F(x)\| + \frac{7}{5} \gamma \right) \sigma \end{aligned} \quad (69)$$

189 where (69) uses the following two inequalities which can be obtained by Lemma B.10:

$$\|\delta\| \leq \|\tilde{\delta}\| + \sigma \quad (70)$$

$$-\langle \nabla F(x), m^+ - \tilde{m}^+ \rangle \leq \|\nabla F(x)\| \sigma \quad (71)$$

190 We next bound  $-\min\left(\eta, \frac{\gamma}{\|\nabla f(x, \xi)\|}\right) \langle \nabla f(x, \xi), \nabla F(x) \rangle$ . Consider the following cases, all of  
191 which are analogous to the proof of Lemma B.3:

192 •  $\|\nabla f(x, \xi)\| \geq \gamma/\eta$ . In this case we can use Lemma B.1 with  $\mu = 2/5$ :

$$\begin{aligned} & -\min\left(\eta, \frac{\gamma}{\|\nabla f(x, \xi)\|}\right) \langle \nabla f(x, \xi), \nabla F(x) \rangle \\ &= -\gamma \frac{\langle \nabla f(x, \xi), \nabla F(x) \rangle}{\|\nabla f(x, \xi)\|} \\ &\leq \gamma \left( -\frac{2}{5} \|\nabla F(x)\| - \frac{3}{5} \|\nabla f(x, \xi)\| + \frac{7}{5} \|\nabla F(x) - \nabla f(x, \xi)\| \right) \\ &\leq \gamma \left( -\frac{2}{5} \|\nabla F(x)\| - \frac{3\gamma}{5\eta} + \frac{7}{5} \sigma \right) \end{aligned} \quad (72)$$

193 •  $\|\nabla f(x, \xi)\| < \gamma/\eta$ . In this case

$$\begin{aligned} & -\min\left(\eta, \frac{\gamma}{\|\nabla f(x, \xi)\|}\right) \langle \nabla f(x, \xi), \nabla F(x) \rangle \\ &= -\eta \langle \nabla f(x, \xi), \nabla F(x) \rangle \\ &= -\eta \|\nabla F(x)\|^2 - \eta \langle \nabla f(x, \xi) - \nabla F(x), \nabla F(x) \rangle \end{aligned} \quad (73)$$

194 We now bound  $-\eta \|\nabla F(x)\|^2$ . If  $\|\nabla F(x)\| \geq \frac{4\gamma}{5\eta}$ , then  $-\eta \|\nabla F(x)\|^2 \leq -\frac{4}{5} \gamma \|\nabla F(x)\|$ .

195 If  $\|\nabla F(x)\| < \frac{4\gamma}{5\eta}$  and  $\|m^+\| \geq \frac{4\gamma}{5\eta}$ , then using the same calculation as in the deterministic  
196 case,

$$\begin{aligned} -\eta \|\nabla F(x)\|^2 &\leq -\frac{2}{5} \times \frac{4}{5} \gamma \|\nabla F(x)\| - \frac{16}{25} \times \frac{3\gamma^2}{5\eta} + \frac{4}{5} \times \frac{8}{5} \gamma (\|m^+\| - \|\nabla F(x)\|) \\ &\leq -\frac{4}{5} \times \frac{2}{5} \gamma \|\nabla F(x)\| - \frac{16}{25} \times \frac{3\gamma^2}{5\eta} + \frac{7}{5} \gamma (\|\tilde{\delta}\| + \sigma) \end{aligned}$$

197 If  $\|\nabla F(x)\| < \frac{4\gamma}{5\eta}$  and  $\|m^+\| < \frac{4\gamma}{5\eta}$ , then  $\|\tilde{m}\| \geq \gamma/\eta$ . Using the same calculation we have

$$\begin{aligned} -\eta \|\nabla F(x)\|^2 &\leq -\frac{2}{5} \gamma \|\nabla F(x)\| - \frac{3\gamma^2}{5\eta} + \frac{8}{5} \gamma (\|\tilde{m}\| - \|\nabla F(x)\|) \\ &\leq -\frac{2}{5} \gamma \|\nabla F(x)\| - \frac{3\gamma^2}{5\eta} + \frac{8}{5\beta} \gamma \|\tilde{\delta}\| \end{aligned}$$

198 Therefore in all the cases we have

$$\begin{aligned} & -\min\left(\eta, \frac{\gamma}{\|\nabla f(x, \xi)\|}\right) \langle \nabla f(x, \xi), \nabla F(x) \rangle \leq -\frac{4}{5} \times \frac{2}{5} \gamma \|\nabla F(x)\| - \frac{16}{25} \times \frac{3\gamma^2}{5\eta} + \frac{8}{5\beta} \gamma \|\tilde{\delta}\| \\ & \quad - \eta \langle \nabla F(x), \nabla f(x, \xi) - \nabla F(x) \rangle + \left( \eta \|\nabla F(x)\| + \frac{7}{5} \gamma \right) \sigma \end{aligned} \quad (74)$$

199 we finally obtain

$$\begin{aligned} & G(x^+, \tilde{m}^+) - G(x, \tilde{m}) \\ &\leq -\frac{4}{5} \times \frac{2\gamma}{5} \|\nabla F(x)\| - \frac{16}{25} \times \frac{3\gamma^2}{5\eta} + \frac{\gamma^2}{2} (AL_0 + BL_1 \|\nabla F(x)\|) + \frac{12}{5\beta} \gamma \|\tilde{\delta}\| \\ &\quad - \nu \eta \langle \nabla F(x), m^+ - \tilde{m}^+ \rangle - (1 - \nu) \eta \langle \nabla F(x), \nabla f(x, \xi) - \nabla F(x) \rangle + \left( \eta \|\nabla F(x)\| + \frac{7}{5} \gamma \right) \sigma \end{aligned} \quad (75)$$

200

□

201 Let  $\mathcal{S} = \{t \in [0, T-1] : \max(5\|F(x_t)\|/4, \|m_{t+1}\|, \|\tilde{m}_t\|) \geq \gamma/\eta\}$  and  $\bar{\mathcal{S}} = [0, T-1] \setminus \mathcal{S}$ . Let  
 202  $T_{\mathcal{S}} = |\mathcal{S}|$ , then  $T - T_{\mathcal{S}} = |\bar{\mathcal{S}}|$ . Parallel to Corollary B.4, we directly have the following corollary.

203 **Corollary B.12** *Let set  $\mathcal{S}$  and  $T_{\mathcal{S}}$  be defined above. Then*

$$\begin{aligned}
 & \sum_{t \in \mathcal{S}} G(x_{t+1}, m_{t+1}) - G(x_t, m_t) \\
 & \leq \frac{12\gamma}{5\beta(1-\beta)} \|\tilde{\delta}_0\| + \left( \frac{12}{5(1-\beta)} AL_0 + \frac{12\gamma}{5\eta(1-\beta)} BL_1 + \frac{1}{2} AL_0 \right) \gamma^2 T_{\mathcal{S}} \\
 & \quad - \eta \sum_{t \in \mathcal{S}} (\nu \langle \nabla F(x_t), m_{t+1} - \tilde{m}_{t+1} \rangle + (1-\nu) \langle \nabla F(x_t), \nabla f(x_t, \xi_t) - \nabla F(x_t) \rangle) + \\
 & \quad \gamma \sum_{t \in \mathcal{S}} \left[ - \left( \left( \frac{4}{5} \times \frac{2}{5} - \frac{\eta}{\gamma} \sigma \right) \|\nabla F(x_t)\| + \left( \frac{16}{25} \times \frac{3\gamma}{5\eta} - \frac{7}{5} \sigma \right) \right) + \frac{\gamma}{2} BL_1 \|\nabla F(x_t)\| + \frac{12\gamma}{5(1-\beta)} BL_1 \|\nabla F(x_t)\| \right]
 \end{aligned} \tag{76}$$

204 Next we turn to the case in which  $\max(5\|\nabla F(x)\|/4, \|m^+\|, \|\tilde{m}\|) \leq \gamma/\eta$ .

205 **Lemma B.13** *Assume  $\max(5\|\nabla F(x)\|/4, \|m^+\|, \|\tilde{m}\|) \leq \gamma/\eta$ , and  $\gamma/\eta = 5\sigma$ . If  $AL_0\eta \leq 1$ , then*  
 206

$$\begin{aligned}
 & G(x^+, \tilde{m}^+) - G(x, \tilde{m}) \\
 & \leq -\frac{\eta}{2}(1-\nu\beta)\|\nabla F(x)\|^2 - \frac{\eta}{2}\nu\beta\|\tilde{m}\|^2 + \frac{\gamma^2}{2}BL_1\|\nabla F(x)\| \\
 & \quad - \nu\eta \langle \nabla F(x), m^+ - \tilde{m}^+ \rangle - (1-\nu)\eta \langle \nabla F(x), \nabla f(x, \xi) - \nabla F(x) \rangle \\
 & \quad + \eta^2 AL_0 \sigma \|\nu\tilde{m}^+ + (1-\nu)\nabla F(x)\| + \frac{1}{2}\eta^2 AL_0 \|\nu(m^+ - \tilde{m}^+) + (1-\nu)(\nabla f(x, \xi) - \nabla F(x))\|^2
 \end{aligned} \tag{77}$$

207 where  $c_1 = \nu(1-\beta)(2-\beta) - AL_0\eta(1-\beta\nu)^2 + 2(1-\nu)$ ,  $c_2 = \nu\beta(1-\beta) - AL_0\eta\beta\nu(1-\beta\nu)$ ,  $c_3 =$   
 208  $\nu\beta(1+\beta) - AL_0\eta(\beta\nu)^2$ .  $c_1 = (1-\beta)[2-\beta - AL_0\eta(1-\beta)]$ ,  $c_2 = \beta[1-\beta - AL_0\eta(1-\beta)]$  and  
 209  $c_3 = \beta(1+\beta - AL_0\eta\beta)$ .

210 **Proof:** Because  $\|\nabla f(x, \xi)\| \leq 4\gamma/5\eta + \sigma = \gamma/\eta$  and  $\|m^+\| \leq \gamma/\eta$ , the algorithm performs an  
 211 unnormalized update. The proof is similar to the one in Lemma B.5 except for bounding the term  
 212  $F(x^+) - F(x)$ .

$$\begin{aligned}
 & F(x^+) - F(x) \\
 & \leq -\langle \nabla F(x), \nu\eta m^+ + (1-\nu)\eta \nabla f(x, \xi) \rangle + \frac{\eta^2}{2}(AL_0 + BL_1\|\nabla F(x)\|)\|\nu m^+ + (1-\nu)\nabla f(x, \xi)\|^2 \\
 & \leq -\nu\eta \langle \nabla F(x), \tilde{m}^+ \rangle - \nu\eta \langle \nabla F(x), m^+ - \tilde{m}^+ \rangle \\
 & \quad - (1-\nu)\eta \langle \nabla F(x), \nabla F(x) \rangle - (1-\nu)\eta \langle \nabla F(x), \nabla f(x, \xi) - \nabla F(x) \rangle \\
 & \quad + \frac{\eta^2}{2}AL_0 (\|\nu\tilde{m}^+ + (1-\nu)\nabla F(x)\|^2 + \|\nu(m^+ - \tilde{m}^+) + (1-\nu)(\nabla f(x, \xi) - \nabla F(x))\|^2) \\
 & \quad + \eta^2 AL_0 \sigma \|\nu\tilde{m}^+ + (1-\nu)\nabla F(x)\| + \frac{\eta^2}{2}BL_1\|\nabla F(x)\| \frac{\gamma^2}{\eta^2}
 \end{aligned} \tag{78}$$

213 For bounding term  $-\nu\eta \langle \nabla F(x), \tilde{m}^+ \rangle - (1-\nu)\eta \langle \nabla F(x), \nabla F(x) \rangle + \frac{\eta^2}{2}AL_0\|\nu\tilde{m}^+ + (1-$   
 214  $\nu)\nabla F(x)\|^2$  that is not related to noise, the subsequent steps are the same as in Lemma B.5, B.6  
 215 and Corollary B.7 (except for  $L$  in these Lemmas being replaced by  $AL_0$ ). Other terms in (78) just  
 216 appears in (77). Proof is completed. □

217 Note that the descent inequality in Lemma B.13 is small in terms of  $\|\nabla F(x)\|$  if  $\nu$  and  $\beta$  are close  
 218 to 1. We now try to convert the term  $\|\tilde{m}\|$  into  $\|\nabla F(x)\|$ , which is stated in the following lemma.

219 **Lemma B.14** Suppose  $AL_0\eta \leq c_1(1-\beta)$  and  $BL_1\gamma \leq c_3(1-\beta)$  for some constant  $c_1$  and  $c_3$ . Let  
 220  $\tilde{m}_0 = \nabla F(x_0)$  for simplicity. Let set  $\mathcal{S}$  and  $\bar{\mathcal{S}}$  be defined in Corollary B.12. Then

$$\begin{aligned} \mathbb{E} \sum_{t \in \bar{\mathcal{S}}} \|\tilde{m}_t\| &\geq \frac{1}{1+c_1} \mathbb{E} \left( \sum_{t \in \bar{\mathcal{S}}} (1 - c_1(1-\nu\beta) - c_3) \|\nabla F(x_t)\| - c_1\sigma \right) \\ &\quad - \frac{1}{1-\beta} \mathbb{E} \left( \sum_{t \in \mathcal{S}} (AL_0 + BL_1 \|\nabla F(x_t)\|) \gamma \right) \end{aligned} \quad (79)$$

221 **Proof:** The proof of Lemma B.14 is similar to the proof of Lemma B.8. We first write (44) again  
 222 as follows:

$$\begin{aligned} &\sum_{t=0}^{T-1} \|m_t - \nabla F(x_t)\| \\ &\leq \frac{1}{1-\beta} \sum_{t=0}^{T-1} (AL_0 + BL_1 \|\nabla F(x_t)\|) \times \\ &\quad \left( \nu \min \left( \eta, \frac{\gamma}{\|m_{t+1}\|} \right) \|m_{t+1}\| + (1-\nu) \min \left( \eta, \frac{\gamma}{\|\nabla f(x_t, \xi_t)\|} \right) \|\nabla f(x_t, \xi_t)\| \right) \\ &\leq \frac{1}{1-\beta} \left( \sum_{t=0}^{T-1} BL_1 \gamma \|\nabla F(x_t)\| + \sum_{t \in \mathcal{S}} AL_0 \gamma + \sum_{t \in \bar{\mathcal{S}}} AL_0 \eta ((1-\nu) \|\nabla f(x_t, \xi_t)\| + \nu \|m_{t+1}\|) \right) \end{aligned} \quad (80)$$

223 Therefore,

$$\begin{aligned} &\sum_{t=0}^{T-1} \|m_t - \nabla F(x_t)\| \\ &\leq \frac{1}{1-\beta} \sum_{t \in \mathcal{S}} (AL_0 + BL_1 \|\nabla F(x_t)\|) \gamma \\ &\quad + \frac{1}{1-\beta} \sum_{t \in \bar{\mathcal{S}}} [AL_0 \nu \eta \|\tilde{m}_{t+1}\| + (BL_1 \gamma + AL_0(1-\nu)\eta) \|\nabla F(x_t)\| + AL_0 \eta \sigma] \\ &\leq \frac{1}{1-\beta} \sum_{t \in \mathcal{S}} (AL_0 + BL_1 \|\nabla F(x_t)\|) \gamma + \\ &\quad \frac{1}{1-\beta} \sum_{t \in \bar{\mathcal{S}}} (AL_0 \nu \eta \beta \|\tilde{m}_t\| + (AL_0 \eta(1-\nu\beta) + BL_1 \gamma) \|\nabla F(x_t)\| + AL_0 \eta \sigma) \\ &\leq \frac{1}{1-\beta} \sum_{t \in \mathcal{S}} (AL_0 + BL_1 \|\nabla F(x_t)\|) \gamma + \sum_{t \in \bar{\mathcal{S}}} ((c_1(1-\nu\beta) + c_3) \|\nabla F(x_t)\| + c_1 \nu \beta \|m_t\| + c_1 \sigma) \end{aligned} \quad (81)$$

224 Using  $\|\tilde{m}_t\| \geq \|\nabla F(x_t)\| - \|\tilde{m}_t - \nabla F(x_t)\|$  and some straightforward calculation, we obtain

$$\begin{aligned} (1+c_1) \sum_{t \in \bar{\mathcal{S}}} \|\tilde{m}_t\| &\geq \sum_{t \in \bar{\mathcal{S}}} ((1 - c_1(1-\nu\beta) - c_3) \|\nabla F(x_t)\| - c_1\sigma) \\ &\quad - \frac{1}{1-\beta} \mathbb{E} \left( \sum_{t \in \mathcal{S}} (AL_0 + BL_1 \|\nabla F(x_t)\|) \gamma \right) \end{aligned} \quad (82)$$

225

□

226 We now merge the two cases corresponding to Corollary B.12 and Lemma B.13. The proof of the  
 227 following theorem involves many techniques which are different from the deterministic case and is  
 228 far more challenging.



**Theorem B.15** Let  $F^*$  be the optimal value, and  $\Delta = F(x_0) - F^*$ . Assume  $m_0 = \nabla F(x_0)$  for simplicity. Fix  $\varepsilon \leq 0.1$  be a small constant. If  $\gamma \leq \frac{\varepsilon}{\sigma} \min\left(\frac{\varepsilon}{AL_0}, \frac{1-\beta}{AL_0}, \frac{1-\beta}{50BL_1}\right)$  and  $\gamma/\eta = 5\sigma$  where constants  $A = 1.01, B = 1.01$ , then

$$\frac{1}{T} \sum_{t=1}^T \mathbb{E} \|\nabla F(x_t)\| \leq 2\varepsilon \quad (83)$$

as long as

$$T \geq \frac{3}{\varepsilon^2 \eta} \Delta \quad (84)$$

**Proof:** Based on the previous results, we take summation over  $t$  and obtain

$$\begin{aligned} & \sum_{t=0}^{T-1} (G(x_{t+1}, \tilde{m}_{t+1}) - G(x_t, \tilde{m}_t)) \\ & \leq \frac{12\gamma}{5\beta(1-\beta)} \|\tilde{\delta}_0\| + \left( \frac{12}{5(1-\beta)} AL_0 + \frac{12\gamma}{5\eta(1-\beta)} BL_1 + \frac{1}{2} AL_0 \right) \gamma^2 T_S \\ & \quad - \eta \sum_{t=0}^{T-1} (\nu \langle \nabla F(x_t), m_{t+1} - \tilde{m}_{t+1} \rangle + (1-\nu) \langle \nabla F(x_t), \nabla f(x_t, \xi_t) - \nabla F(x_t) \rangle) + \\ & \quad \gamma \sum_{t \in \mathcal{S}} \left[ - \left( \left( \frac{4}{5} \times \frac{2}{5} - \frac{\eta}{\gamma} \sigma \right) \|\nabla F(x_t)\| + \left( \frac{16}{25} \times \frac{3\gamma}{5\eta} - \frac{7}{5} \sigma \right) \right) + \frac{\gamma}{2} BL_1 \|\nabla F(x_t)\| + \frac{12\gamma}{5(1-\beta)} BL_1 \|\nabla F(x_t)\| \right] \\ & \quad + \sum_{t \in \bar{\mathcal{S}}} -\frac{\eta}{2} ((1-\nu\beta) \|\nabla F(x_t)\|^2 + \nu\beta \|\tilde{m}_t\|^2) + \frac{\gamma^2}{2} BL_1 \|\nabla F(x_t)\| \\ & \quad + \sum_{t \in \bar{\mathcal{S}}} AL_0 \eta^2 \sigma \|(1-\nu) \nabla F(x_t) + \nu \tilde{m}_{t+1}\| + \frac{AL_0}{2} \eta^2 \|(1-\nu) (\nabla f(x_t, \xi_t) - \nabla F(x_t)) + \nu(m_{t+1} - \tilde{m}_{t+1})\|^2 \end{aligned} \quad (85)$$

We now simplify (85) by taking expectation. We first have

$$\mathbb{E}[\langle \nabla F(x_t), \nabla f(x_t, \xi_t) - \nabla F(x_t) \rangle] = 0 \quad (86)$$

due to the noise assumption. For the term  $\mathbb{E} \|(1-\nu) (\nabla f(x_t, \xi_t) - \nabla F(x_t)) + \nu(m_{t+1} - \tilde{m}_{t+1})\|^2$ , similarly using the noise assumption and Lemma B.10, we can obtain

$$\mathbb{E} \|(1-\nu) (\nabla f(x_t, \xi_t) - \nabla F(x_t)) + \nu(m_{t+1} - \tilde{m}_{t+1})\|^2 \leq \left( (1-\beta\nu)^2 + \frac{1-\beta}{1+\beta} \beta^2 \nu^2 \right) \sigma^2 \quad (87)$$

We now tackle the most challenging part: the expectation of  $\langle \nabla F(x_t), m_{t+1} - \tilde{m}_{t+1} \rangle$  for some  $t$ .

$$\begin{aligned} & -\mathbb{E} \langle \nabla F(x_t), m_{t+1} - \tilde{m}_{t+1} \rangle \\ & = -\mathbb{E} [\langle \nabla F(x_t), \beta(m_t - \tilde{m}_t) + (1-\beta)(\nabla f(x_t, \xi_t) - \nabla F(x_t)) \rangle] \\ & = -\beta \mathbb{E} \langle \nabla F(x_t), m_t - \tilde{m}_t \rangle \\ & = \beta \mathbb{E} [-\langle \nabla F(x_{t-1}), m_t - \tilde{m}_t \rangle + \langle \nabla F(x_{t-1}) - \nabla F(x_t), m_t - \tilde{m}_t \rangle] \end{aligned} \quad (88)$$

Applying the above equation recursively, we obtain

$$-\mathbb{E} \langle \nabla F(x_t), m_{t+1} - \tilde{m}_{t+1} \rangle \leq \mathbb{E} \sum_{\tau=0}^{t-1} \beta^{t-\tau} \langle \nabla F(x_\tau) - \nabla F(x_{\tau+1}), m_{\tau+1} - \tilde{m}_{\tau+1} \rangle \quad (89)$$

Therefore

$$-\mathbb{E} \sum_{t=0}^{T-1} \langle \nabla F(x_t), m_{t+1} - \tilde{m}_{t+1} \rangle \leq \frac{\beta}{1-\beta} \sum_{t=0}^{T-1} \max(\mathbb{E} \langle \nabla F(x_t) - \nabla F(x_{t+1}), m_{t+1} - \tilde{m}_{t+1} \rangle, 0) \quad (90)$$

240 We now bound  $\mathbb{E}[\langle \nabla F(x_t) - \nabla F(x_{t+1}), m_{t+1} - \tilde{m}_{t+1} \rangle]$ .

$$\begin{aligned}
& \mathbb{E} \langle \nabla F(x_t) - \nabla F(x_{t+1}), m_{t+1} - \tilde{m}_{t+1} \rangle \\
&= \mathbb{E} \int_0^1 (x_t - x_{t+1})^T \nabla^2 F(\mu x_t + (1 - \mu)x_{t+1}) (m_{t+1} - \tilde{m}_{t+1}) d\mu \\
&= \mathbb{E} \left[ \min \left( \eta, \frac{\gamma}{\|m_{t+1}\|} \right) \int_0^1 \nu m_{t+1}^T \nabla^2 F(\mu x_t + (1 - \mu)x_{t+1}) (m_{t+1} - \tilde{m}_{t+1}) d\mu \right] \\
&\quad + \mathbb{E} \left[ \min \left( \eta, \frac{\gamma}{\|\nabla f(x_t, \xi_t)\|} \right) \int_0^1 (1 - \nu) \nabla f(x_t, \xi_t)^T \nabla^2 F(\mu x_t + (1 - \mu)x_{t+1}) (m_{t+1} - \tilde{m}_{t+1}) d\mu \right] \\
&\leq \mathbb{E} \left[ \min \left( \eta, \frac{\gamma}{\|m_{t+1}\|} \right) \int_0^1 \nu \tilde{m}_{t+1}^T \nabla^2 F(\mu x_t + (1 - \mu)x_{t+1}) (m_{t+1} - \tilde{m}_{t+1}) d\mu \right] \\
&\quad + \mathbb{E} \left[ \min \left( \eta, \frac{\gamma}{\|\nabla f(x_t, \xi_t)\|} \right) \int_0^1 (1 - \nu) \nabla F(x_t)^T \nabla^2 F(\mu x_t + (1 - \mu)x_{t+1}) (m_{t+1} - \tilde{m}_{t+1}) d\mu \right] \\
&\quad + \eta \mathbb{E}[(AL_0 + BL_1 \|\nabla F(x_t)\|)] \sigma^2 (1 - \beta) \left( \frac{\nu}{1 + \beta} + 1 - \nu \right) \\
&\leq \mathbb{E} \left[ \min \left( \eta, \frac{\gamma}{\|m_{t+1}\|} \right) \nu (AL_0 + BL_1 \|\nabla F(x_t)\|) \|\tilde{m}_{t+1}\| \sigma \right] \\
&\quad + \mathbb{E} \left[ \min \left( \eta, \frac{\gamma}{\|\nabla f(x_t, \xi_t)\|} \right) (1 - \nu) (AL_0 + BL_1 \|\nabla F(x_t)\|) \|\nabla F(x_t)\| \sigma \right] \\
&\quad + \eta \mathbb{E}[(AL_0 + BL_1 \|\nabla F(x_t)\|)] \sigma^2 (1 - \beta) \left( \frac{\nu}{1 + \beta} + 1 - \nu \right) \\
&\leq \mathbb{E} [\eta (\nu \|\tilde{m}_{t+1}\| + (1 - \nu) \|\nabla F(x_t)\|) AL_0 \sigma] \\
&\quad + \mathbb{E} \left[ \left( \nu \min \left( \eta, \frac{\gamma}{\|m_{t+1}\|} \right) \|\tilde{m}_{t+1}\| + (1 - \nu) \min \left( \eta, \frac{\gamma}{\|\nabla f(x_t, \xi_t)\|} \right) \|\nabla F(x_t)\| \right) BL_1 \|\nabla F(x_t)\| \sigma \right] \\
&\quad + \eta \mathbb{E}[(AL_0 + BL_1 \|\nabla F(x_t)\|)] \sigma^2 (1 - \beta) \left( \frac{\nu}{1 + \beta} + 1 - \nu \right) \\
&\leq \eta \mathbb{E}[(\nu \|\tilde{m}_{t+1}\| + (1 - \nu) \|\nabla F(x_t)\|) AL_0 \sigma] + \eta AL_0 \sigma^2 (1 - \beta) \left( \frac{\nu}{1 + \beta} + 1 - \nu \right) \\
&\quad + \frac{6}{5} \gamma \mathbb{E}[BL_1 \|\nabla F(x_t)\| \sigma] + \frac{1}{5} \gamma \mathbb{E}[BL_1 \|\nabla F(x_t)\| \sigma]
\end{aligned} \tag{91}$$

241 where the first inequality uses the proof of Corollary A.4 and Lemma B.10, and the last inequality  
242 uses  $\gamma/\eta = 5\sigma$ . By taking summation of the above inequality we obtain

$$\begin{aligned}
-\sum_{t=0}^{T-1} \mathbb{E} \langle \nabla F(x_t), m_{t+1} - \tilde{m}_{t+1} \rangle &\leq \frac{\beta}{1 - \beta} \sum_{t=0}^{T-1} \left( \eta AL_0 + \frac{7}{5} \gamma BL_1 \right) \sigma \|\nabla F(x_t)\| \\
&\quad + \eta AL_0 \sigma^2 \beta \left( \frac{\nu}{1 + \beta} + 1 - \nu \right) T + \frac{\nu \beta^2}{(1 - \beta)^2} \eta AL_0 \sigma \|\nabla F(x_0)\|
\end{aligned} \tag{92}$$

243 where we uses the following inequality to convert  $\|\tilde{m}_{t+1}\|$  to  $\|\nabla F(x_t)\|$ .

$$\begin{aligned}
\sum_{t=0}^{T-1} \|\tilde{m}_{t+1}\| &\leq \frac{\beta}{1 - \beta} \|\nabla F(x_0)\| + (1 - \beta) \sum_{t=0}^{T-1} \sum_{\tau=0}^t \beta^{t-\tau} \|\nabla F(x_\tau)\| \\
&\leq \frac{\beta}{1 - \beta} \|\nabla F(x_0)\| + \sum_{t=0}^{T-1} \|\nabla F(x_t)\|
\end{aligned} \tag{93}$$

244 Combining (85), (86), (87), (92), using inequality (93) to get rid of the term  $\|\tilde{m}_t\|$  and applying  
 245 Lemma B.10, we obtain

$$\begin{aligned}
 & \mathbb{E} \sum_{t=0}^{T-1} (G(x_{t+1}, \tilde{m}_{t+1}) - G(x_t, \tilde{m}_t)) \\
 & \leq \frac{12\gamma}{5\beta(1-\beta)} \|\tilde{\delta}_0\| + \frac{\nu\beta}{(1-\beta)^2} AL_0 \eta^2 \sigma \|\nabla F(x_0)\| + \left( \frac{12}{5(1-\beta)} AL_0 + \frac{12\gamma}{5\eta(1-\beta)} BL_1 + \frac{1}{2} AL_0 \right) \gamma^2 T_S + \\
 & \quad \gamma \mathbb{E} \sum_{t \in \mathcal{S}} \left[ - \left( \left( \frac{4}{5} \times \frac{2}{5} - \frac{\eta}{\gamma} \sigma \right) \|\nabla F(x_t)\| + \left( \frac{16}{25} \times \frac{3\gamma}{5\eta} - \frac{7}{5} \sigma \right) \right) + \frac{\gamma}{2} BL_1 \|\nabla F(x_t)\| + \frac{12\gamma}{5(1-\beta)} BL_1 \|\nabla F(x_t)\| \right] \\
 & \quad + \mathbb{E} \sum_{t \in \bar{\mathcal{S}}} \left( -\frac{\eta}{2} (1-\nu\beta) \|\nabla F(x_t)\|^2 - \frac{\eta}{2} \nu\beta \|m_t\|^2 + \frac{\gamma^2}{2} BL_1 \|\nabla F(x_t)\| \right) \\
 & \quad + \mathbb{E} \sum_{t=0}^{T-1} \eta^2 AL_0 \sigma \left( \|\nabla F(x_t)\| + \left( \frac{(1-\nu\beta)^2}{2} + \frac{1-\beta}{2(1+\beta)} \nu^2 \beta^2 \right) \sigma \right) \\
 & \quad + \frac{\nu\beta\eta\sigma}{1-\beta} \mathbb{E} \left( \sum_{t=0}^{T-1} (AL_0 \eta \|\nabla F(x_t)\| + \frac{7}{5} BL_1 \gamma \|\nabla F(x_t)\|) \right) + AL_0 \eta^2 \sigma^2 \nu\beta \left( \frac{\nu}{1+\beta} + 1 - \nu \right) T \\
 & = P_0 + \mathbb{E} \left( P_1 T_S + P_2 (T - T_S) + \sum_{t \in \mathcal{S}} P_3 \|\nabla F(x_t)\| + \sum_{t \in \bar{\mathcal{S}}} P_4 \|\nabla F(x_t)\| \right) \\
 & \quad - \mathbb{E} \sum_{t \in \bar{\mathcal{S}}} \frac{\eta}{2} ((1-\beta) \|\nabla F(x_t)\|^2 + \beta \|\tilde{m}_t\|^2)
 \end{aligned} \tag{94}$$

246 where

$$\begin{aligned}
 P_0 &= \frac{12\gamma}{5\beta(1-\beta)} \|\tilde{\delta}_0\| + \frac{\nu\beta}{(1-\beta)^2} AL_0 \eta^2 \sigma \|\nabla F(x_0)\| = \frac{\nu\beta}{(1-\beta)^2} AL_0 \eta^2 \sigma \|\nabla F(x_0)\| \\
 P_1 &= -\frac{16}{25} \times \frac{3\gamma^2}{5\eta} + \left( \frac{12\gamma^2}{5(1-\beta)} + \frac{\gamma^2}{2} \right) AL_0 + \frac{12\gamma^3}{5\eta(1-\beta)} BL_1 + \frac{7}{5} \gamma \sigma + P_2 \\
 P_2 &= AL_0 \eta^2 \sigma^2 \left( \frac{(1-\nu\beta)^2}{2} + \frac{1-\beta}{2(1+\beta)} \nu^2 \beta^2 \right) + AL_0 \eta^2 \sigma^2 \nu\beta \left( \frac{\nu}{1+\beta} + 1 - \nu \right) = \frac{1}{2} \eta^2 AL_0 \sigma^2 \\
 P_3 &= -\frac{4}{5} \times \frac{2}{5} \gamma + \eta \sigma + \left( \frac{\gamma^2}{2} + \frac{12\gamma^2}{5(1-\beta)} + \frac{\nu\beta\eta\sigma}{1-\beta} \times \frac{7}{5} \gamma \right) BL_1 + \eta^2 AL_0 \sigma + \frac{\nu\beta\sigma}{1-\beta} AL_0 \eta^2 \\
 P_4 &= \eta^2 AL_0 \sigma + \frac{\nu\beta\sigma}{1-\beta} \left( AL_0 \eta + \frac{7}{5} BL_1 \gamma \right) \eta + \frac{\gamma^2}{2} BL_1
 \end{aligned}$$

247 Let  $\gamma \leq \frac{\varepsilon}{2\sigma} \min \left( \frac{\varepsilon}{AL_0}, \frac{1-\beta}{AL_0}, \frac{1-\beta}{25BL_1} \right)$ , and fix the ratio  $\gamma/\eta = 5\sigma$ . Then for small enough  $\varepsilon < 0.1$   
 248 and large enough noise  $\sigma > 1$ ,

$$\begin{aligned}
 P_1 &\leq \left( -\frac{16}{25} \times 3\sigma + \frac{3\varepsilon}{2\sigma} + \frac{12\varepsilon}{50} + \frac{7}{5} \sigma + \frac{\varepsilon^2}{100\sigma} \right) \gamma \leq -\frac{3}{10} \sigma \gamma \\
 P_3 &\leq \left( -\frac{4}{5} \times \frac{2}{5} + \frac{1}{5} + \left( \frac{1-\beta}{2} + \frac{12}{5} + \frac{7}{5} \times \frac{\beta}{5} \right) \frac{\varepsilon}{50\sigma} + \frac{\varepsilon^2}{50\sigma^2} + \frac{\varepsilon}{50\sigma^2} \right) \gamma \leq -\frac{1}{10} \gamma
 \end{aligned} \tag{95}$$

249 We can also bound  $P_4$  as follows:

$$\begin{aligned}
 P_4 &\leq \frac{1}{1-\beta} AL_0 \sigma \eta^2 + \left( \frac{\beta}{1-\beta} \times \frac{7}{5} + \frac{5}{2} \right) BL_1 \sigma \gamma \eta \\
 &\leq \frac{1}{10} \varepsilon \eta + \left( \frac{\beta}{1-\beta} \times \frac{7}{5} + \frac{5}{2} \right) \frac{\varepsilon}{50} (1-\beta) \eta \\
 &\leq \frac{1}{10} \varepsilon \eta + \frac{1}{20} \varepsilon \eta = \frac{3}{20} \varepsilon \eta
 \end{aligned} \tag{96}$$

250 Applying the above estimates and rearranging (94), we have

$$\begin{aligned}
& G(x_0) - F^* + P_0 \\
& \geq \mathbb{E} \left[ \sum_{t \in \mathcal{S}} \left( \frac{3}{10} \sigma \gamma + \frac{1}{10} \gamma \|\nabla F(x_t)\| \right) + \sum_{t \in \bar{\mathcal{S}}} \left( \frac{\eta}{2} ((1 - \nu\beta) \|\nabla F(x_t)\|^2 + \nu\beta \|m_t\|^2) - \frac{AL_0}{2} \sigma^2 \eta^2 - \frac{3}{20} \varepsilon \eta \|\nabla F(x_t)\| \right) \right] \\
& \geq \mathbb{E} \left[ \sum_{t \in \mathcal{S}} \left( \frac{3}{10} \sigma \gamma + \frac{1}{10} \gamma \|\nabla F(x_t)\| \right) + \sum_{t \in \bar{\mathcal{S}}} \left( \frac{\eta}{2} ((1 - \nu\beta) \|\nabla F(x_t)\|^2) - \frac{AL_0}{2} \sigma^2 \eta^2 - \frac{3}{20} \varepsilon \eta \|\nabla F(x_t)\| \right) \right] \\
& \quad + \frac{1}{2} \eta \nu \beta \mathbb{E} \left[ \sum_{t \in \bar{\mathcal{S}}} (2\varepsilon \|\tilde{m}_t\| - \varepsilon^2) \right]
\end{aligned} \tag{97}$$

251 Due to Lemma B.14 ( $AL_0 \eta \sigma \leq \frac{\varepsilon}{10} (1 - \beta)$ ,  $BL_1 \gamma \leq \frac{\varepsilon}{50} (1 - \beta)$ ), we clearly have

$$\begin{aligned}
& \mathbb{E} \sum_{t \in \bar{\mathcal{S}}} \|\tilde{m}_t\| \\
& \geq \left(1 - \frac{\varepsilon}{10}\right) \mathbb{E} \left[ \sum_{t \in \bar{\mathcal{S}}} \left( \left(1 - \frac{\varepsilon}{5}\right) \|\nabla F(x_t)\| - \frac{\varepsilon}{10} \right) \right] - \mathbb{E} \left[ \sum_{\tau \in \mathcal{S}} \left( \frac{\gamma}{1 - \beta} (AL_0 + BL_1 \|\nabla F(x_\tau)\|) \right) \right] \\
& \geq \left(1 - \frac{3}{10} \varepsilon\right) \mathbb{E} \left[ \sum_{t \in \bar{\mathcal{S}}} (\|\nabla F(x_t)\|) \right] - \frac{\varepsilon}{10} (T - T_{\mathcal{S}}) - \mathbb{E} \left[ \sum_{\tau \in \mathcal{S}} \left( \frac{\gamma}{1 - \beta} (AL_0 + BL_1 \|\nabla F(x_\tau)\|) \right) \right]
\end{aligned} \tag{98}$$

252 Define

$$\begin{aligned}
U(x) &:= \left( \frac{1}{10} \gamma - \frac{\nu\beta}{1 - \beta} BL_1 \varepsilon \gamma \eta \right) \|\nabla F(x)\| + \left( \frac{3}{10} \sigma \gamma - \frac{\nu\beta}{1 - \beta} AL_0 \varepsilon \gamma \eta \right) \\
V(x) &:= \frac{1}{2} \eta (1 - \nu\beta) \|\nabla F(x)\|^2 + \left( \frac{19}{20} \nu\beta \eta \varepsilon - \frac{3}{20} \varepsilon \eta \right) \|\nabla F(x)\| - \left( \frac{1}{2} AL_0 \sigma^2 \eta^2 + \frac{1}{2} \nu\beta \varepsilon^2 \eta + \frac{1}{10} \nu\beta \varepsilon^2 \eta \right)
\end{aligned} \tag{99}$$

253 Plugging (98) into (97), we obtain

$$\begin{aligned}
G(x_0) - F^* + P_0 & \geq \mathbb{E} \left[ \sum_{t \in \mathcal{S}} U(x_t) + \sum_{t \in \bar{\mathcal{S}}} V(x_t) \right] \\
& = \mathbb{E} \left[ \sum_{t=1}^T (\mathbb{I}_{t \in \mathcal{S}} U(x_t) + \mathbb{I}_{t \in \bar{\mathcal{S}}} V(x_t)) \right] \geq \mathbb{E} \left[ \sum_{t=0}^{T-1} \min\{U(x_t), V(x_t)\} \right]
\end{aligned} \tag{100}$$

254 Since

$$\begin{aligned}
U(x) & \geq \left( \frac{1}{10} - \frac{\nu\beta \varepsilon^2}{50 \sigma^2} \right) \gamma \|\nabla F(x)\| + \left( \frac{3}{10} \sigma \gamma - \frac{1}{10 \sigma^2} \nu\beta \varepsilon^2 \gamma \right) \\
& \geq \frac{1}{20} \gamma \|\nabla F(x)\| + \frac{1}{5} \sigma \gamma
\end{aligned} \tag{101}$$

255

$$\begin{aligned}
V(x) & \geq \frac{1}{2} \eta (1 - \nu\beta) \|\nabla F(x)\|^2 + \left( \frac{19}{20} \nu\beta \eta \varepsilon - \frac{3}{20} \varepsilon \eta \right) \|\nabla F(x)\| - \left( \frac{1}{20} + \frac{3}{5} \nu\beta \right) \varepsilon^2 \eta \\
& \geq \frac{1}{2} \eta (1 - \nu\beta) (2\varepsilon \|\nabla F(x)\| - \varepsilon^2) + \left( \frac{19}{20} \nu\beta \eta \varepsilon - \frac{3}{20} \varepsilon \eta \right) \|\nabla F(x)\| - \left( \frac{1}{20} + \frac{3}{5} \nu\beta \right) \varepsilon^2 \eta \\
& \geq \frac{4}{5} \varepsilon \eta \|\nabla F(x)\| - \frac{4}{5} \varepsilon^2 \eta
\end{aligned} \tag{102}$$

256 It clearly follows that  $\min\{U(x), V(x)\} \geq \frac{4}{5}\varepsilon\eta\|\nabla F(x)\| - \frac{4}{5}\varepsilon^2\eta$ . Therefore

$$G(x_0) - F^* + P_0 \geq \frac{4}{5}\varepsilon\eta\mathbb{E} \sum_{t=0}^{T-1} (\|\nabla F(x_t)\| - \varepsilon) \quad (103)$$

257 Therefore, as long as  $T > \frac{5}{4\varepsilon^2\eta} (G(x_0) - F^* + P_0)$ , we have  $\frac{1}{T}\mathbb{E} \left[ \sum_{t=1}^T \|\nabla F(x_t)\| \right] < 2\varepsilon$ .

258 We finally show  $G(x_0) - F^* + P_0 = O(F(x_0) - F^*)$ . Using Lemma A.5,

$$\frac{1}{1-\beta} \min(\gamma\|m_0\|, \eta\|m_0\|^2) \leq \frac{1}{50} \min\left(\frac{\|\nabla F(x_0)\|}{L_1}, \frac{\|\nabla F(x_0)\|^2}{L_0}\right) \leq \frac{8}{50}(F(x_0) - F^*) \quad (104)$$

259 For the term  $P_0$ , if  $\|\nabla F(x_0)\| = \Omega(L_0/L_1)$ , we can similarly use Lemma A.5 to obtain  $P_0 =$   
 260  $\mathcal{O}(F(x_0) - F^*)$ . If  $\|\nabla F(x_0)\| = \mathcal{O}(L_0/L_1)$ , using  $L_0\|\nabla F(x_0)\| \leq L_1\|\nabla F(x_0)\|^2$  and Lemma  
 261 A.5 leads to the result.  $\square$

## 262 Appendix C Discussion of the normalized momentum algorithm

263 In this section we analyze in detail the theoretical aspects of the normalized momentum algorithm,  
 264 as well as some practical issues. Recall that this algorithm can be seen as a special case of our  
 265 clipping framework. For convenience we re-write it in Algorithm 2.

---

### Algorithm 2: The Stochastic Normalized Momentum Algorithm(SNM)

---

**Input :** Initial point  $x_0$ , initial momentum  $m_0$ , the learning rate  $\eta$ , momentum factor  $\beta$  and the  
 total number of iterations  $T$

```

1 for  $i \leftarrow 1$  to  $T$  do
2    $m_t \leftarrow \beta m_{t-1} + (1-\beta)\nabla f(x_{t-1}, \xi_{t-1})$ ;
3    $x_t \leftarrow x_{t-1} - \eta \frac{m_t}{\|m_t\|}$ ;

```

---

266 We remark that SNM is different from the clipping methods in traditional sense, in that it makes a  
 267 *normalized* update each iteration. This algorithm has been analyzed in Cutkosky and Mehta [2020]  
 268 for  $L$ -smooth functions. In that setting they were able to prove that SNM achieves a complexity of  
 269  $\mathcal{O}(\Delta L \sigma^2 \varepsilon^{-4})$ .

270 For  $(L_0, L_1)$ -smooth functions, we show that: **(a)**. With carefully chosen momentum parameter  
 271  $\beta$  and step size  $\eta$ , SNM can achieve a complexity of  $\mathcal{O}(\Delta L_0 \sigma^2 \varepsilon^{-4})$ , which is the same as the  
 272 complexity we obtain in Theorem 3.2. **(b)**. There are some practical issues that make SNM less  
 273 favorable than traditional clipping methods (such as the other three special cases of our framework  
 274 discussed in Section 3 of the main paper).

275 The following results provides convergence guarantee for Algorithm 2.

**Lemma C.1** Consider the algorithm that starts at  $x_0$  and make updates  $x_{t+1} = x_t - \eta m_{t+1}$ . Define  
 $\delta_t := m_{t+1} - \nabla F(x_t)$  be the estimation error. Assume  $\eta \leq c/L_1$  for some  $c > 0$  and let constants  
 $A = 1 + e^c - \frac{e^c - 1}{c}$ ,  $B = \frac{e^c - 1}{c}$ . Then

$$F(x_{t+1}) - F(x_t) \leq -\left(\eta - \frac{1}{2}BL_1\eta^2\right)\|\nabla F(x_t)\| + \frac{1}{2}AL_0\eta^2 + 2\eta\|\delta_t\|$$

And thus, by a telescope sum we have

$$\left(1 - \frac{1}{2}BL_1\eta\right) \sum_{t=0}^{T-1} \|\nabla F(x_t)\| \leq \frac{F(x_0) - F(x_T)}{\eta} + \frac{1}{2}AL_0T\eta + 2 \sum_{t=0}^{T-1} \|\delta_t\|$$

276 **Proof:** Since  $\|x_{t+1} - x_t\| = \eta_t$ , by Lemma A.3 we have

$$\begin{aligned} F(x_{t+1}) - F(x_t) &\leq -\frac{\eta}{\|m_{t+1}\|} \langle \nabla F(x_t), m_{t+1} \rangle + \frac{1}{2} \eta^2 (AL_0 + BL_1 \|\nabla F(x_t)\|) \\ &\leq \eta (-\|\nabla F(x_t)\| + 2\|\delta_t\|) + \frac{1}{2} \eta^2 (AL_0 + BL_1 \|\nabla F(x_t)\|) \\ &\leq -\left(\eta - \frac{1}{2} BL_1 \eta^2\right) \|\nabla F(x_t)\| + \frac{1}{2} AL_0 \eta^2 + 2\eta \|\delta_t\| \end{aligned}$$

277 where in the second inequality we use Lemma B.1.  $\square$

**Theorem C.2** Suppose that Assumptions 1,2 and 4 holds, and  $\Delta = F(x_0) - F^*$  where  $F^* = \inf_{x \in \mathbb{R}^d} F(x)$ . Let  $m_0 = \nabla F(x_0)$  in Algorithm 2 for simplicity, and denote  $\alpha = 1 - \beta$ . If we choose  $\eta = \Theta(\min(L_1^{-1}, L_0^{-1} \varepsilon) \alpha)$  and  $\alpha = \Theta(\sigma^{-2} \varepsilon^2)$ , then as long as  $\varepsilon = \mathcal{O}\left(\min\left\{\frac{L_0}{L_1}, \sigma\right\}\right)$ , we have

$$\frac{1}{T} \sum_{t=0}^{T-1} \mathbb{E}[\|\nabla F(x_t)\|] \leq \varepsilon$$

278 holds in  $T = \mathcal{O}(\Delta L_0 \sigma^2 \varepsilon^{-4})$  iterations.

279 **Proof:** Define the estimation errors  $\delta_t := m_{t+1} - \nabla F(x_t)$ . Denote  $S(a, b) := \nabla F(a) - \nabla F(b)$ ,  
280 then for  $a, b$  such that  $\|a - b\| = \eta \leq c/L_1$ , we can upper bound  $S(a, b)$  using Corollary A.4:

$$\|S(a, b)\| \leq \eta (AL_0 + BL_1 \|\nabla F(b)\|) \quad (105)$$

281 We can use  $S(a, b)$  to get a recursive relationship:

$$\begin{aligned} \delta_{t+1} &= \beta m_{t+1} + (1 - \beta) \nabla f(x_{t+1}, \xi_{t+1}) - \nabla F(x_{t+1}) \\ &= \beta S(x_t, x_{t+1}) + \beta \delta_t + (1 - \beta) (\nabla f(x_{t+1}, \xi_{t+1}) - \nabla F(x_{t+1})) \end{aligned} \quad (106)$$

Denote  $\delta'_t = \nabla f(x_t, \xi_t) - \nabla F(x_t)$ , then

$$\delta_t = \beta \sum_{\tau=0}^{t-1} \beta^\tau S(x_{t-\tau-1}, x_{t-\tau}) + (1 - \beta) \sum_{\tau=0}^{t-1} \beta^\tau \delta'_{t-\tau} + (1 - \beta) \beta^t \delta'_0$$

282 Using triangle inequality and plugging in the estimate (105), we have

$$\|\delta_t\| \leq (1 - \beta) \left\| \sum_{\tau=0}^t \beta^\tau \delta'_{t-\tau} \right\| + \beta \eta \sum_{\tau=0}^{t-1} \beta^\tau (AL_0 + BL_1 \|\nabla F(x_{t-\tau-1})\|) \quad (107)$$

283 Taking a telescope summation of 107 and using Assumption 2.4 we obtain

$$\begin{aligned} \mathbb{E} \left[ \sum_{t=0}^{T-1} \|\delta_t\| \right] &\leq T(1 - \beta) \sqrt{\sum_{\tau=0}^{+\infty} \beta^{2\tau} \sigma^2} + \frac{AL_0 \eta T}{1 - \beta} + \frac{BL_1 \eta}{1 - \beta} \sum_{t=0}^{T-1} \mathbb{E}[\|\nabla F(x_t)\|] \\ &\leq \sqrt{\alpha} T \sigma + \frac{AT L_0 \eta}{\alpha} + \frac{BL_1 \eta}{\alpha} \sum_{t=0}^{T-1} \mathbb{E}[\|\nabla F(x_t)\|] \end{aligned} \quad (108)$$

Now we use Lemma C.1:

$$\left(1 - \left(\frac{1}{2} + \frac{2}{\alpha}\right) BL_1 \eta\right) \mathbb{E} \sum_{t=0}^{T-1} \|\nabla F(x_t)\| \leq \frac{\Delta}{\eta} + \frac{1}{2} AL_0 T \eta + 2 \left(\sqrt{\alpha} T \sigma + \frac{AL_0 \eta T}{\alpha}\right)$$

If we choose  $\eta = \Theta(\min(L_1^{-1}, L_0^{-1} \varepsilon) \alpha)$  and  $\alpha = \Theta(\sigma^{-2} \varepsilon^2)$ , then

$$\left(1 - \left(\frac{1}{2} + \frac{2}{\alpha}\right) BL_1 \eta\right) = \Theta(1)$$

In this case

$$\frac{1}{T} \mathbb{E} \sum_{t=0}^{T-1} \|\nabla F(x_t)\| = \mathcal{O} \left( \frac{\Delta}{\eta T} + \frac{1}{2} AL_0 \eta + \sqrt{\alpha} \sigma + \frac{AL_0 \eta}{\alpha} \right) = \mathcal{O} \left( \frac{\Delta}{\eta T} + \varepsilon \right)$$

284 Therefore for  $T = \Theta\left(\frac{\Delta}{\eta\varepsilon}\right)$ , we have  $\frac{1}{T}\mathbb{E}\sum_{t=0}^{T-1}\|\nabla F(x_t)\| = \mathcal{O}(\varepsilon)$ . If  $\varepsilon = \mathcal{O}(L_0/L_1)$ , then  $\frac{\Delta}{\eta\varepsilon}$   
 285 reduces to  $\Delta L_0 \sigma^2 \varepsilon^{-4}$ .  $\square$

286 We have shown the theoretical superiority of Algorithm 2. Specifically, it enjoys the same complex-  
 287 ity as Theorem 3.2. However we notice some potential drawbacks of Algorithm 2:

- 288 • *Firstly*, the step size of Algorithm 2 is at the order of  $\mathcal{O}(\varepsilon^3)$ , while the step size we chose  
 289 in Theorem 3.2 is  $\mathcal{O}(\varepsilon^2)$ . Previous works have noticed that a smaller step size makes it  
 290 easier to be trapped in a sharp local minima, which may result in worse generalization  
 291 [Kleinberg et al., 2018].
- 292 • *Secondly*, although the complexity of Algorithm 2 is the same as Theorem 3.2 for small  $\varepsilon$ , it  
 293 requires a more restrictive upper bound of  $\varepsilon$  to ensure the  $\varepsilon^{-4}$  term dominates. For instance  
 294 with a poor initialization,  $\Delta$  may very large. This suggests that in practice, where we do  
 295 not get into a very small neighbourhood of stationary point, the performance of Algorithm  
 296 2 may be worse.

## 297 Appendix D Details of Lower Bounds in Section 3.3

298 In this section we discuss the lower bound for SGD in Drori and Shamir [2019] in detail. The  
 299 following result is taken from this paper:

300 **Theorem D.1 [Theorem 2 in Drori and Shamir [2019]]** Consider a first-order method that given  
 301 a function  $F : \mathbb{R}^d \rightarrow \mathbb{R}$  and an initial point  $x_0 \in \mathbb{R}^d$  generates a sequence of points  $\{x_i\}$  satisfying

$$x_{t+1} = x_t + \eta_{x_0, \dots, x_t} \cdot (\nabla F(x_t) + \xi_t), \quad t \in [T-1]$$

302 where  $\xi_i$  are some random noise vectors, and returns a point  $x_{out} \in \mathbb{R}^d$  as a non-negative linear  
 303 combination of the iterates:

$$x_{out} = \sum_{t=0}^T \zeta_{x_0, \dots, x_T}^{(t)} x_t$$

304 We further assume that the step sizes  $\eta_{x_0, \dots, x_t}$  and aggregation coefficients  $\zeta_{x_0, \dots, x_T}^{(t)}$  are deter-  
 305 ministic functions of the norms and inner products between the vectors  $x_0, \dots, x_t, \nabla F(x_0) +$   
 306  $\xi_0, \dots, \nabla F(x_t) + \xi_t$ . Then for any  $L, \Delta, \sigma > 0$  and  $T \in \mathbb{N}$  there exists a function  $F : \mathbb{R}^d \mapsto \mathbb{R}$   
 307 with  $L$ -Lipschitz gradient, a point  $x_0 \in \mathbb{R}^d$  and independent random variables  $\xi_t$  with  $\mathbb{E}[\xi_t] = 0$   
 308 and  $\mathbb{E}[\|\xi_t\|^2] = \sigma^2$  such that  $\forall t \in [T]$

$$\begin{aligned} F(x_0) - F(x_t) &\stackrel{a.s.}{\leq} \Delta \\ \nabla F(x_t) &\stackrel{a.s.}{=} \gamma \end{aligned}$$

309 and in addition

$$\begin{aligned} F(x_0) - F(x_{out}) &\stackrel{a.s.}{\leq} \Delta + \frac{\sigma}{2L} \sqrt{\frac{L\Delta}{T}} \\ \nabla F(x_{out}) &\stackrel{a.s.}{=} \gamma \end{aligned}$$

311 where  $\gamma \in \mathbb{R}^d$  is a vector such that

$$\|\gamma\|^2 = \frac{\sigma}{2} \sqrt{\frac{L\Delta}{T}}$$

312 Now we discuss why this shows the optimality of clipped SGD under Assumptions 2.1, 2.2 and 2.4.

313 *Firstly*, Theorem D.1 assumes an upper bound  $\Delta$  on  $F(x_0) - F(x_t)$  rather than the one assumed  
 314 in Assumption 2.1 ( $F(x_0) - F^* \leq \Delta$ ). However, in fact we only need to assume that  $F(x_0) -$   
 315  $F(x_T) \leq \Delta$  to prove Theorem 3.2 for clipped SGD. The reason is as follows. In fact, since  $\beta =$   
 316  $0$  for clipped SGD, the momentum term in the energy function disappears, as well as the term  
 317  $\frac{\nu\beta}{(1-\beta)^2} AL_0 \eta^2 \sigma \|\nabla F(x_0)\|$  in (94). So we no longer need to use Lemma A.5 to bound the term  
 318  $\|\nabla F(x_0)\|$ . The rest of the proof only needs  $F(x_0) - F(x_T) \leq \Delta$  (which is used in the telescope  
 319 sum in (94)).

320 *Secondly*, although Theorem D.1 only assume that the variance of stochastic gradient is bounded, in  
 321 their construction the noise is actually defined as

$$P(\xi_t = \pm \sigma \mathbf{e}_{t+1}) = \frac{1}{2}, \quad t \in [T-1] \quad (109)$$

322 Therefore the norm of the noise is bounded by  $\sigma$ , and the example used to prove Theorem D.1 still  
 323 works under Assumption 2.4.

324 Now suppose we need an output such that  $\|\nabla f(x_{\text{out}})\| = \|\gamma\| \leq \varepsilon$ , then it follows from Theorem  
 325 D.1 that  $T = \Omega(L\Delta\sigma^2\varepsilon^{-4})$ . Therefore we have shown the optimality of clipped SGD in this class  
 326 of algorithms, as stated in Section 3.3.

## 327 Appendix E Justifications on the Mixed Clipping

328 We will show in this section that combining gradient and momentum can be better than using only  
 329 one of them. We consider a basic optimization problem:  $\min_{x \in \mathbb{R}} F(x) = \min_{x \in \mathbb{R}} \mathbb{E}_\xi[f(x, \xi)]$   
 330 where  $f(x, \xi) = \frac{1}{2}(x + \xi)^2$ , and the noise  $\xi \in \mathbb{R}$  follows the uniform distribution  $U[-\sqrt{3}, \sqrt{3}]$  so  
 331 that  $\mathbb{E}[\xi^2] = 1$ . To simplify the analysis, we set  $\gamma$  in Algorithm 1 to be sufficiently large such that  
 332 clipping will never be triggered, since the function  $F(x) = \frac{1}{2}x^2$  is (1,0)-smooth.

333 In the above optimization problem, the general update formula can be written as:

$$\begin{aligned} m_{t+1} &= \beta m_t + (1 - \beta)(x_t + \xi_t) \\ x_{t+1} &= x_t - \nu \eta m_{t+1} - (1 - \nu)\eta(x_t + \xi_t) \end{aligned} \quad (110)$$

334 We have the following proposition:

335 **Proposition E.1** *Let  $x_0, m_0 \in \mathbb{R}$  be arbitrary real numbers. Let  $\xi_i$ s be i.i.d. random noises such*  
 336 *that  $\mathbb{E}[\xi_i^2] = 1$ . Let the sequence  $\{x_t\}$  be defined in (110), where  $0 < \eta < 1, 0 \leq \beta < 1$  and*  
 337  *$0 \leq \nu \leq 1$  are constant hyper-parameters. Then in the limit*

$$\lim_{t \rightarrow \infty} \mathbb{E}[F(x_t)] = \frac{\eta}{2} \times \frac{(1 + \beta)(1 - \beta + \beta\eta) - \nu\eta\beta(1 + 3\beta - 2\nu\beta)}{(2 - \eta)(1 + \beta)(1 - \beta + \beta\eta) - \nu\eta\beta(4\beta - \eta - 3\beta\eta + 2\nu\eta\beta)} \quad (111)$$

338 We now analyze three cases based on the proposition:

- 339 • Only use gradient in an update. Set  $\nu = 0$  in (111), we obtain  $\lim_{t \rightarrow \infty} \mathbb{E}[F(x_t)] = \frac{\eta}{4 - 2\eta}$ .
- 340 • Only use momentum in an update. Set  $\nu = 1$  in (111), we obtain  $\lim_{t \rightarrow \infty} \mathbb{E}[F(x_t)] =$   
 341  $\frac{\eta}{4 - 2\eta \frac{1 - \beta}{1 + \beta}}$ .
- 342 • Combine gradient and momentum in an update. It can be verified that for proper  $0 < \nu < 1$ ,  
 343 (111) is less than  $\frac{\eta}{4 - 2\eta \frac{1 - \beta}{1 + \beta}}$  (therefore less than  $\frac{\eta}{4 - 2\eta}$ ). Furthermore, when  $\beta \rightarrow 1$ , a straight-  
 344 forward calculation shows that  $\lim_{t \rightarrow \infty} \mathbb{E}[F(x_t)] \rightarrow \frac{\eta}{\frac{4}{1 - \nu} - 2\eta}$ . Thus  $\lim_{t \rightarrow \infty} \mathbb{E}[F(x_t)]$  can  
 345 be arbitrarily close to zero if  $\nu$  is close to 1. However, this does not happen in the previous  
 346 two cases, where  $\lim_{t \rightarrow \infty} \mathbb{E}[F(x_t)]$  there must be greater than  $\frac{\eta}{4}$ .

347 We further plot the value of (111) with respect to  $\nu$  and  $\beta$  in Figure 1 to visualize the above finding.  
 348 It can be clearly seen that the using both gradient and momentum with a proper interpolation factor  
 349  $\nu$  outperforms both SGD and SGD with momentum by a large margin (Figure 1(a)). Furthermore,  
 350 we can drive  $\beta \rightarrow 1$  to further improve convergence (Figure 1(b)), while in SGD with momentum  
 351 we can not.

352 Although we use the simple function  $F(x) = \frac{1}{2}x^2$  as an example, similar result exists in any gen-  
 353 eral quadratic form with positive definite Hessian. Furthermore, the experiments in Section 4 also  
 354 demonstrate that the mixed clipping outperforms both gradient clipping and momentum clipping.



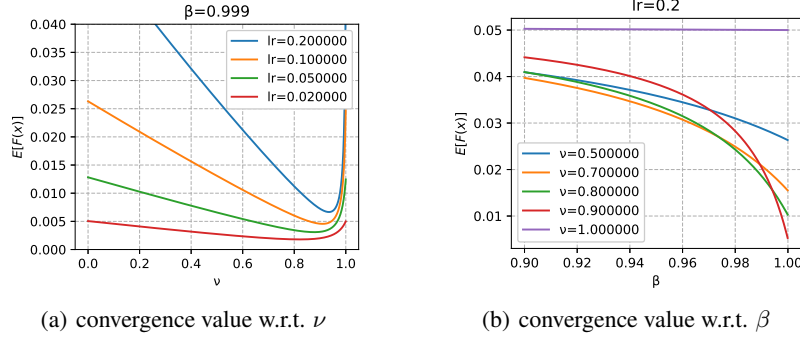

Figure 1: Convergence value of different hyper-parameters  $\eta, \beta, \nu$  over stochastic function  $f(x, \xi) = \frac{1}{2}(x + \xi)^2$ . The mixed update with proper  $\nu$  outperforms both SGD and SGD with momentum by a large margin. Furthermore, for the mixed update we can drive  $\beta \rightarrow 1$  to further improve convergence, while for SGD with momentum we can not.

## 355 E.1 Proof of Proposition E.1

### 356 E.1.1 Proof of a simple case

357 For clarity, we first assume  $\nu = 1$ . Consider a specific time step  $t$ . We first calculate  $\mathbb{E}[m_t^2]$ .

$$\begin{aligned} \mathbb{E}[m_{t+1}^2] &= \mathbb{E}[(\beta m_t + (1 - \beta)(x_t + \xi_t))^2] \\ &= \beta^2 \mathbb{E}[m_t^2] + (1 - \beta)^2 (\mathbb{E}[x_t^2] + \mathbb{E}[\xi_t^2]) + 2(1 - \beta)^2 \mathbb{E}[x_t \xi_t] + 2\beta(1 - \beta)(\mathbb{E}[m_t x_t] + \mathbb{E}[m_t \xi_t]) \\ &= \beta^2 \mathbb{E}[m_t^2] + (1 - \beta)^2 (\mathbb{E}[x_t^2] + 1) + 2\beta(1 - \beta) \mathbb{E}[m_t x_t] \end{aligned} \quad (112)$$

358 where we use the fact that  $\xi_t$  is independent with  $x_t$  and  $m_t$ . We then calculate  $\mathbb{E}[x_t^2]$ .

$$\begin{aligned} \mathbb{E}[x_{t+1}^2] &= \mathbb{E}[(x_t - \eta m_t)^2] \\ &= \mathbb{E}[x_t^2 + \eta^2 m_{t+1}^2 - 2\eta x_t m_{t+1}] \\ &= (1 + \eta^2(1 - \beta)^2 - 2\eta(1 - \beta)) \mathbb{E}[x_t^2] + \eta^2 \beta^2 \mathbb{E}[m_t^2] + \eta^2(1 - \beta)^2 + 2(\eta^2 \beta(1 - \beta) - \eta \beta) \mathbb{E}[m_t x_t] \end{aligned} \quad (113)$$

359 where in the last equation we use (112). To complete the recursive relationship, we also need to  
360 calculate  $\mathbb{E}[x_{t+1} m_{t+1}]$ .

$$\begin{aligned} \mathbb{E}[x_{t+1} m_{t+1}] &= \mathbb{E}[m_{t+1} x_t - \eta m_{t+1}^2] \\ &= \mathbb{E}[\beta m_t x_t + (1 - \beta)x_t^2 - \eta m_{t+1}^2] \\ &= (1 - \beta)(1 - \eta(1 - \beta)) \mathbb{E}[x_t^2] - \eta \beta^2 \mathbb{E}[m_t^2] - \eta(1 - \beta)^2 + (\beta - 2\eta \beta(1 - \beta)) \mathbb{E}[m_t x_t] \end{aligned} \quad (114)$$

361 Combining (112), (113) and (114), we can write the recursive relationship into a matrix form:

$$\begin{pmatrix} \mathbb{E}x_{t+1}^2 \\ \mathbb{E}m_{t+1}^2 \\ \mathbb{E}x_{t+1}m_{t+1} \\ 1 \end{pmatrix} = \begin{pmatrix} 1 + \eta^2(1 - \beta)^2 - 2\eta(1 - \beta) & \eta^2 \beta^2 & 2(\eta^2 \beta(1 - \beta) - \eta \beta) & \eta^2(1 - \beta)^2 \\ (1 - \beta)^2 & \beta^2 & 2\beta(1 - \beta) & (1 - \beta)^2 \\ (1 - \beta)(1 - \eta(1 - \beta)) & -\eta \beta^2 & \beta - 2\eta \beta(1 - \beta) & -\eta(1 - \beta)^2 \\ 0 & 0 & 0 & 1 \end{pmatrix} \begin{pmatrix} \mathbb{E}x_t^2 \\ \mathbb{E}m_t^2 \\ \mathbb{E}x_t m_t \\ 1 \end{pmatrix} \quad (115)$$

Denote the above matrix as  $M$ . After a straightforward calculation, we can find that  $\lambda_1 = 1$  is an eigenvalue of  $M$ , and

$$u = \left( -\eta \frac{1 + \beta}{1 - \beta}, -2, \eta, \eta - 2 \frac{1 + \beta}{1 - \beta} \right)^T$$

362 is the only eigenvector associated with  $\lambda_1 = 1$ . Similarly,  $\lambda_2 = \beta$  is also an eigenvalue of  $M$ . Let  
363 the other two eigenvalues be  $\lambda_3$  and  $\lambda_4$ , then

$$\begin{aligned} \lambda_1 \lambda_2 \lambda_3 \lambda_4 &= \det M = \beta^3 \\ \lambda_1 + \lambda_2 + \lambda_3 + \lambda_4 &= \text{tr } M = 1 - \beta + (\eta(1 - \beta) - \beta - 1)^2 \end{aligned}$$

364 It follows that  $\lambda_3\lambda_4 = \beta^2$  and  $\lambda_3 + \lambda_4 = (\eta(1 - \beta) - \beta - 1)^2 - 2\beta$ . Since  $(1 + \beta - \eta(1 - \beta))^2 <$   
 365  $(1 + \beta)^2$ , we have  $\lambda_3 + \lambda_4 < 1 + \beta^2$ . Therefore  $|\lambda_3| < 1$  and  $|\lambda_4| < 1$  (note that  $\lambda_3$  and  $\lambda_4$  can be  
 366 composite numbers). If  $\eta < 1$ , we can further conclude that the four eigenvalues are different from  
 367 each other (otherwise  $\lambda_3 = \lambda_4 = \beta$ , which contradicts to  $\lambda_3 + \lambda_4 = (\eta(1 - \beta) - \beta - 1)^2 - 2\beta$ ).

Based on the above calculation, for any initial vector  $v$ ,  $\lim_{t \rightarrow \infty} M^t v$  converges to a vector proportional to  $u$ . In our case,  $(\mathbb{E}x_0^2, \mathbb{E}m_0^2, \mathbb{E}x_0m_0, 1)^T = (0, 0, 0, 1)^T$ , and we also know that the the last element of the vector  $\lim_{t \rightarrow \infty} M^t(0, 0, 0, 1)^T$  is 1. As a result,

$$\lim_{t \rightarrow \infty} M^t(0, 0, 0, 1)^T = -\frac{1 - \beta}{2(1 + \beta)}u$$

Namely,

$$\lim_{t \rightarrow \infty} \mathbb{E}[x_{t+1}^2] = \frac{\eta}{2 - \eta \frac{1 - \beta}{1 + \beta}}$$

### 368 E.1.2 Proof of the general case

369 Now we prove Proposition E.1 for general  $\nu$ .

$$\mathbb{E}[x_{t+1}^2] = (1 - \eta + \nu\eta\beta)^2 \mathbb{E}[x_t^2] + \nu^2 \eta^2 \beta^2 \mathbb{E}[m_t^2] - 2\nu\eta\beta(1 + \nu\eta\beta - \eta) \mathbb{E}[m_t x_t] + (\nu\eta(1 - \beta) + (1 - \nu)\eta)^2 \quad (116)$$

$$\begin{aligned} \mathbb{E}[x_{t+1}m_{t+1}] &= (1 - \eta + \nu\eta\beta)(1 - \beta) \mathbb{E}[x_t^2] - \nu\eta\beta^2 \mathbb{E}[m_t^2] + (1 - \eta - \nu\eta + 2\nu\eta\beta)\beta \mathbb{E}[x_t m_t] \\ &\quad - \nu\eta(1 - \beta)^2 - (1 - \nu)\eta(1 - \beta) \end{aligned} \quad (117)$$

370 Combining (112), (116) and (117), we obtain the following recursive matrix  $M$ :

$$M = \begin{pmatrix} (1 - \eta + \nu\eta\beta)^2 & \nu^2 \eta^2 \beta^2 & -2\nu\eta\beta(1 + \nu\eta\beta - \eta) & (\nu\eta(1 - \beta) + (1 - \nu)\eta)^2 \\ (1 - \beta)^2 & \beta^2 & 2\beta(1 - \beta) & (1 - \beta)^2 \\ (1 - \eta + \nu\eta\beta)(1 - \beta) & -\nu\eta\beta^2 & (1 - \eta - \nu\eta + 2\nu\eta\beta)\beta & -\nu\eta(1 - \beta)^2 - (1 - \nu)\eta(1 - \beta) \\ 0 & 0 & 0 & 1 \end{pmatrix}$$

371 Using the same calculation as in the previous section, we finally get

$$\lim_{t \rightarrow \infty} \mathbb{E}[x_{t+1}^2] = \eta \frac{(1 + \beta)(1 - \beta + \beta\eta) - \nu\eta\beta(1 + 3\beta - 2\nu\beta)}{(2 - \eta)(1 + \beta)(1 - \beta + \beta\eta) - \nu\eta\beta(4\beta - \eta - 3\beta\eta + 2\nu\eta\beta)} \quad (118)$$

## 372 Appendix F Soft Clipping

---

### Algorithm 3: The General Soft Clipping Framework

---

**Input :** Initial point  $x_0$ , learning rate  $\eta$ , clipping parameter  $\gamma$ , momentum  $\beta \in [0, 1)$ , interpolation parameter  $\nu \in [0, 1]$  and the total number of iterations  $T$

- 1 Initialize  $m_0$  arbitrarily;
  - 2 **for**  $t \leftarrow 0$  **to**  $T - 1$  **do**
  - 3     Compute the stochastic gradient  $\nabla f(x_t, \xi_t)$  for the current point  $x_t$ ;
  - 4      $m_{t+1} \leftarrow \beta m_t + (1 - \beta) \nabla f(x_t, \xi_t)$ ;
  - 5      $x_{t+1} \leftarrow x_t - \left[ \nu \eta \frac{m_{t+1}}{1 + \eta \|m_{t+1}\|/\gamma} + (1 - \nu) \eta \frac{\nabla f(x_t, \xi_t)}{1 + \eta \|\nabla f(x_t, \xi_t)\|/\gamma} \right]$ ;
- 

373 For Algorithm 1, as long as the norm of the gradient (or momentum) exceeds a constant, it is then  
 374 clipped; we refer to this form of clipping as *hard clipping*. One can also consider a *soft* form of  
 375 clipping, as presented in Algorithm 3.

376 We take  $\nu = 0$  for example to analyze soft clipping. For any gradient norm  $l_g$ , the norm of the  
 377 update  $l_u$  is a function of  $l_g$ :

$$l_u = h_{\text{soft}}(l_g) = \eta \frac{l_g}{1 + \eta l_g / \gamma} \quad (119)$$

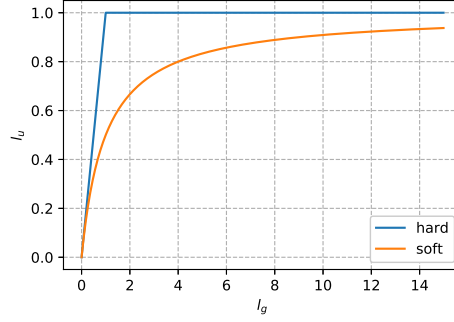

Figure 2: The update norm  $l_u$  w.r.t. the gradient norm  $l_g$  for hard clipping and soft clipping ( $\eta = 1, \gamma = 1$ ).

For hard clipping, we can similarly write

$$l_u = h_{\text{hard}}(l_g) = \min(\eta l_g, \gamma) \quad (120)$$

A straightforward calculation shows that

$$\frac{1}{2} \min(\eta l_g, \gamma) \leq \eta \frac{l_g}{1 + \eta l_g / \gamma} \leq \min(\eta l_g, \gamma) \quad (121)$$

Therefore soft clipping is in fact equivalent to hard clipping up to a constant factor 2 in the step size choice. Thus it's easy to see that our results also hold for Algorithm 3. However, compared to hard clipping, soft clipping has the advantage that the function  $h_{\text{soft}}$  in (119) is smooth while  $h_{\text{hard}}$  in (120) is not, as shown in Figure 2. We also empirically observe that the training curve of soft clipping is more smooth than hard clipping.

## Appendix G Experimental Details in Section 4

Based on the discussion in Appendix F, we use the soft version of clipping algorithms in all the experiments.

### G.1 CIFAR-10

The CIFAR-10 dataset contains 50k images for training and 10k for testing. All the images are  $32 \times 32$  RGB bitmaps. We use the standard ResNet-32 architecture. The total number of parameters is 466,906. For all algorithms, we use mini-batch size 128 and weight decay  $5 \times 10^{-4}$ . For the baseline algorithm, we use SGD with momentum using learning rate  $lr = 1.0$  and momentum factor  $\beta = 0.9$ . Note that we use the momentum defined in Algorithm 1, which is equivalent to a Pytorch implementation with  $lr = 0.1$  and  $\beta = 0.9$ . We optimize ResNet-32 for 150 epochs, and decrease the learning rate at epoch 80 and epoch 120. For other algorithms, we perform a course grid search for  $lr$  and  $\gamma$ , while keeping all the training strategy the same as SGD. We use 5 random seeds ranging from 2016 to 2020, and the results are similar. The plot in Figure 2 uses the random seed 2020.

### G.2 PTB

The Penn Treebank dataset has a vocabulary of size 10k, and 887k/70k/78k words for training/validation/testing. We use the state-of-the-art AWD-LSTM architecture using hidden size 1150 and embedding size 400. The total number of parameters is 23,941,600. For the baseline algorithm, we follow Merity et al. [2017] who use averaged SGD clipping without momentum using learning rate  $lr = 30$  and  $\gamma = 7.5$ . Note that here  $\gamma = 7.5$  means that the gradient norm will be clipped to be no more than 0.25. We use the same dropout rate and regularization hyper-parameters in [Merity et al., 2017]. We train AWD-LSTM for 250 epochs, and averaging is triggered when the validation perplexity stops improving. For other algorithms, we perform a course grid search for  $lr$  and  $\gamma$ , while keeping all the training strategy the same as SGD clipping. We use 5 random seeds ranging from 2016 to 2020, and the results are similar. The plot in Figure 2 uses the random seed 2020.

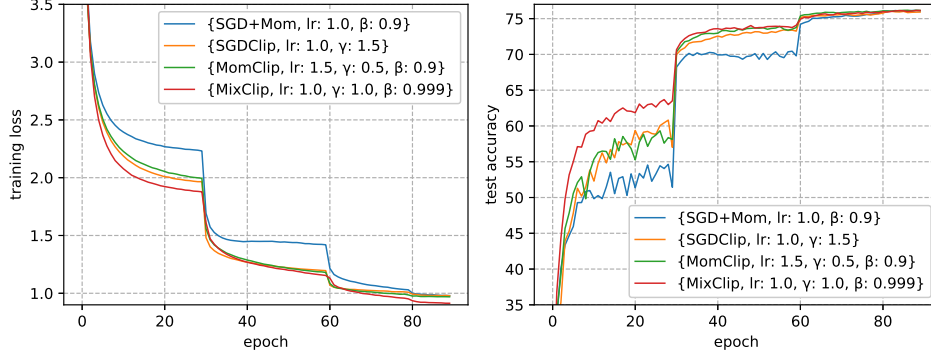

Figure 3: Experimental results on ImageNet.

### G.3 ImageNet

We also conduct experiments on ImageNet dataset. This dataset contains about 1.28 million training images and 50k validation images with various sizes. We train the standard ResNet-50 architecture on this dataset. The total number of parameters is 25,557,032. We use a batch size of 256 on 8 GPUs and a weight decay of  $10^{-4}$ . For the baseline algorithm, we choose SGD with learning rate  $lr = 1.0$  and momentum  $\beta = 0.9$ , following Goyal et al. [2017]. Note that we use the momentum defined in Algorithm 1, which is equivalent to a Pytorch implementation with  $lr = 0.1$  and  $\beta = 0.9$ . We train the ResNet-50 for 90 epochs, and decrease the learning rate in epoch 30, epoch 60 and epoch 80. For the other algorithms, we perform a course grid search for  $lr$  and  $\gamma$ , while keeping all the training strategy the same as SGD.

Figure 3 plot the training loss curve and validation accuracy curve on ImageNet. All the algorithms reach a validation accuracy of about 76%. However, all the clipping algorithms train faster than the baseline SGD. Mixed clipping performs the best among the four algorithms.

## Appendix H Additional experiments in $(L_0, L_1)$ -smooth setting using MNIST dataset

In this section, we are aiming to construct an optimization problem which provably satisfies the  $(L_0, L_1)$ -smoothness condition in this paper rather than the traditional  $L$ -smoothness condition. We then conduct experiments in both deterministic setting and stochastic setting.

We first consider a binary classification problem. Suppose a dataset  $\mathcal{D}$  contains  $n$  samples, denoted as  $\{(x_i, y_i)\}_{i=1}^n$ , where  $x_i$  is a  $d$ -dimensional input vector and  $y_i \in \{-1, +1\}$  is the corresponding label. A discriminant function  $f$  with parameter  $w, b$  is a mapping from  $\mathbb{R}^d$  to  $\mathbb{R}$  such that  $f_{w,b}(x) = w^T x + b$ . We use the empirical error under the exponential loss function (122):

$$L(w, b) = \mathbb{E}_{(x,y) \sim \mathcal{D}} \exp(-yf_{w,b}(x)) = \frac{1}{n} \sum_{i=1}^n \exp(-y_i(w^T x_i + b)) \quad (122)$$

In fact, if the exponential function  $\exp(\cdot)$  is replaced by  $\log(1 + \exp(\cdot))$ , the problem becomes the well-known logistic regression. However, logistic loss has bounded second-order derivative (thus is  $L$ -smooth), while  $\exp(\cdot)$  does not. Furthermore, exponential function is  $(0,1)$ -smooth, thus we expect  $L(w, b)$  is also  $(L_0, L_1)$ -smooth for some  $L_0, L_1$  (see the following proposition). This is why we use exponential loss here. We point out that such exponential loss is also used in a variety of algorithms, such as boosting (AdaBoost).

When the dataset is linearly separable, parameter  $w$  will be driven to infinity through optimization, thus adding some regularization is prevalent in linear classification. We use the following term (123) rather than  $L_2$  norm for regularization, in order to be compatible with  $L(w, b)$ .

$$R_\lambda(w) = \sum_{i=1}^d \left[ \frac{\exp(\lambda w_i) + \exp(-\lambda w_i)}{2} - 1 \right] \quad (123)$$

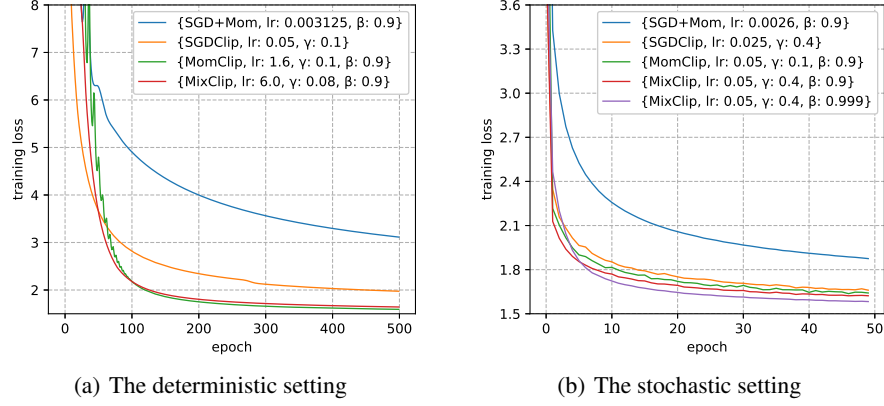

Figure 4: Experimental results on MNIST.

In fact,  $R_\lambda(w)$  is similar to weight decay regularization in that  $R_\lambda(w) = \frac{1}{2}\lambda^2\|w\|^2 + O(\lambda^4\|w\|^4)$  when  $w$  is small.

The total loss  $E_\lambda(w, b) = L(w, b) + R_\lambda(w)$ . We now claim that  $E_\lambda(w, b)$  is indeed  $(L_0, L_1)$ -smooth.

**Proposition H.1** Assume bias term  $b = 0$  for simplicity. Suppose the data points have bounded norm, i.e.  $\|x_i\| \leq R$  for all  $i$  and  $\lambda < R$ . Let the loss function  $E_\lambda(w, 0)$  be defined above. Then for every  $\rho_1 > 0, \rho_2 > 0, \rho = \rho_1 + \rho_2$ ,  $E_\lambda(w, 0)$  is  $(L_0, L_1)$ -smooth w.r.t  $w$  for

$$L_0 = \max \left( \frac{(1+\rho)\sqrt{d}}{\lambda} R^2 (R + d\lambda), (R^2 + d\lambda^2) \left( \frac{n(R^2 + d\lambda^2)}{\rho_1 R^2} \right)^{1+\frac{1}{\rho_2}} \right), L_1 = \frac{(1+\rho)\sqrt{d}}{\lambda} R^2.$$

We use MNIST dataset in this section, which contains 60,000 hand-writing training images. We only evaluate the training speed for different algorithms on the training set rather than the generalization capability. The loss functions is defined to be the sum of ten losses, each of which corresponds to the loss of a binary classification problem to recognize number 0 to 9. Regularization coefficient  $\lambda$  is set to be 0.02.

To compare different algorithms, we choose the best hyperparameters  $lr$  and  $\gamma$  for each algorithm based on a careful grid search.  $\nu$  is set to be 0.7 for mixed clipping. The parameter initialization and all inputs in the stochastic setting are the same for all algorithms. For each run, we average the loss of the last 5 epoch in order to reduce variance. In the deterministic setting we train 500 epochs, each of which uses the entire dataset. In the stochastic setting we train 50 epochs with a mini-batch size 200. We run on 5 different random seeds ranging from 2016 to 2020 altogether and average their results.

Figure 4 plots the results. It is clear that in both settings, clipping is vital to a fast convergence. Also, momentum helps training, and mixed clipping performs the best in the stochastic setting.

### H.1 Proof of Proposition H.1

Consider the augmented dataset  $\tilde{\mathcal{D}}$  containing  $n + 2d$  data points  $\{z_i\}_{i=1}^{n+2d}$ , with

$$z_i = \begin{cases} -x_i y_i & i \leq n \\ \lambda e_{i-n} & n < i \leq n + d \\ -\lambda e_{i-n-d} & n + d < i \leq n + 2d \end{cases} \quad (124)$$

where  $e_i$  is the vector with all zero entries except the  $i$ th entry which is one. Denote coefficient vector  $c \in \mathbb{R}^{n+2d}$  with elements  $c_i = 1/n$  if  $i \leq n$  and  $c_i = 1/2$  otherwise. It directly follows that the original problem with regularization term can be written as:

$$E_\lambda(w) = \frac{1}{n} \sum_{i=1}^n \exp(w^T z_i) + \frac{1}{2} \sum_{i=n+1}^{n+2d} \exp(w^T z_i) - d = \sum_{i=1}^{n+2d} c_i \exp(w^T z_i) - d \quad (125)$$

463 Let  $M = \max_{i \in [n+2d]} w^T z_i$ . Let  $\rho_1 > 0, \rho_2 > 0$  be two constants. Pick  $M_0 = \left(1 + \frac{1}{\rho_2}\right) \log \frac{n(R^2 + d\lambda^2)}{\rho_1 R^2}$ .

464 We consider the following two cases:

465 (1)  $M \leq M_0$ . In this case  $\|\nabla^2 E(w)\|$  can be directly upper bounded:

$$\begin{aligned} \|\nabla^2 E(w)\| &\leq \frac{1}{n} \sum_{i=1}^n \exp(w^T z_i) \|z_i\|^2 + \frac{1}{2} \sum_{i=n+1}^{n+2d} \exp(w^T z_i) \|z_i\|^2 \\ &\leq (R^2 + d\lambda^2) \exp(M) \\ &\leq (R^2 + d\lambda^2) \left( \frac{n(R^2 + d\lambda^2)}{\rho_1 R^2} \right)^{1 + \frac{1}{\rho_2}} \end{aligned} \quad (126)$$

466 The first inequality in (126) uses the triangular inequality of matrix spectral norm and  $\|zz^T\| =$   
467  $\|z^T z\| = \|z\|^2$ .

(2)  $M > M_0$ . Decompose  $M_0$  to be  $M_0 = M_1 + M_2$  where

$$M_1 = \log \frac{n(R^2 + d\lambda^2)}{\rho_1 R^2}, M_2 = \frac{1}{\rho_2} \log \frac{n(R^2 + d\lambda^2)}{\rho_1 R^2}.$$

468 Define set  $I = \{i \in [n + 2d] : w^T z_i \geq M - M_1\}$  and  $I_2 = \{i \in [n + 2d] : w^T z_i < 0\}$ . Then

$$\|\nabla E(w)\| = \sum_{i=1}^{n+2d} c_i \exp(w^T z_i) z_i \quad (127)$$

$$\geq \sum_{i=1}^{n+2d} c_i \exp(w^T z_i) \frac{w^T z_i}{\|w\|} \quad (128)$$

$$\geq \sum_{i \in I} c_i \exp(w^T z_i) \frac{M - M_1}{\|w\|} - \sum_{i \in I_2} c_i \|z_i\| \quad (129)$$

$$\geq \sum_{i \in I} c_i \exp(w^T z_i) \frac{M - M_1}{\|w\|} - (R + d\lambda) \quad (130)$$

469 In (128) we use the Cauchy-Schwartz inequality; In (129) we partition the index  $\{i : i \in [n + 2d]\}$   
470 to three subsets  $I, I_2$  and  $[n + 2d] \setminus (I \cup I_2)$ , and use the lower bound and upper bound of  $w^T z_i > 0$   
471 for each set.

472 Similar, we can upper bound  $\|\nabla^2 E(w)\|$ :

$$\|\nabla^2 E(w)\| \leq \sum_{i \in I} c_i \exp(w^T z_i) \|z_i\|^2 + \sum_{i \notin I} c_i \exp(w^T z_i) \|z_i\|^2 \quad (131)$$

$$\leq \sum_{i \in I} c_i \exp(w^T z_i) R^2 + (R^2 + d\lambda^2) \exp(M - M_1) \quad (132)$$

473 To bound  $\exp(M_1)$ , we again bound  $\|\nabla E(w)\|$  from a different perspective:

$$\|\nabla E(w)\| \geq \sum_{i \in I} c_i \exp(w^T z_i) \frac{w^T z_i}{\|w\|} - \sum_{i \in I_2} c_i \|z_i\| \quad (133)$$

$$\geq \frac{1}{n} \exp(M) \frac{M}{\|w\|} - (R + d\lambda) \quad (134)$$

474 where (134) is obtained by selecting the  $i$  with the largest  $w^T z_i$  which is equal to  $M$ . Substitute  
475 (130) and (134) into (132) then we get

$$\|\nabla^2 E(w)\| \leq \left( \frac{R^2}{M - M_1} + \frac{n(R^2 + d\lambda^2)}{M \exp(M_1)} \right) \|w\| (\|\nabla E(w)\| + R + d\lambda) \quad (135)$$

$$= \left( \frac{R^2}{M - M_1} + \frac{\rho_1 R^2}{M} \right) \|w\| (\|\nabla E(w)\| + R + d\lambda) \quad (136)$$

476 Since  $M = \max_{i \in [n+2d]} w^T z_i$  implies that  $|\lambda w_k| \leq M$  for all  $k \in [d]$  from (124), we can upper bound  
 477 the norm of  $w$ :  $\|w\| \leq \frac{M\sqrt{d}}{\lambda}$ . Substitute this into (136) we get

$$\|\nabla^2 E(w)\| \leq \left( \frac{M}{M - M_1} + \rho_1 \right) \frac{\sqrt{d}}{\lambda} R^2 (\|\nabla E(w)\| + R + d\lambda) \quad (137)$$

$$\leq \frac{(1 + \rho_1 + \rho_2)\sqrt{d}}{\lambda} R^2 (\|\nabla E(w)\| + R + d\lambda) \quad (138)$$

478 Combining the above two cases concludes the proof.

## 479 References

- 480 Ashok Cutkosky and Harsh Mehta. Momentum improves normalized sgd. *arXiv preprint*  
 481 *arXiv:2002.03305*, 2020.
- 482 Yoel Drori and Ohad Shamir. The complexity of finding stationary points with stochastic gradient  
 483 descent. *arXiv preprint arXiv:1910.01845*, 2019.
- 484 Priya Goyal, Piotr Dollár, Ross Girshick, Pieter Noordhuis, Lukasz Wesolowski, Aapo Kyrola, An-  
 485 drew Tulloch, Yangqing Jia, and Kaiming He. Accurate, large minibatch sgd: Training imagenet  
 486 in 1 hour. *arXiv preprint arXiv:1706.02677*, 2017.
- 487 T. H. Gronwall. Note on the derivatives with respect to a parameter of the solutions of a system of  
 488 differential equations. *Annals of Mathematics*, 20(4):292, 1919.
- 489 Bobby Kleinberg, Yuanzhi Li, and Yang Yuan. An alternative view: When does sgd escape local  
 490 minima? In *International Conference on Machine Learning*, pages 2698–2707, 2018.
- 491 Stephen Merity, Nitish Shirish Keskar, and Richard Socher. Regularizing and optimizing lstm lan-  
 492 guage models. *arXiv preprint arXiv:1708.02182*, 2017.
- 493 Jingzhao Zhang, Tianxing He, Suvrit Sra, and Ali Jadbabaie. Why gradient clipping accelerates  
 494 training: A theoretical justification for adaptivity. In *International Conference on Learning Rep-*  
 495 *resentations*, 2020.
